20 **Abstract**

21 Pyroptosis is a form of cell death triggered by the innate immune system that has been  
22 implicated in the pathogenesis of sepsis and acute lung injury. At the cellular level,  
23 pyroptosis is characterized by cell swelling, membrane rupture, and release of  
24 inflammatory cytokines, such as IL-1 $\beta$ . However, the role of endogenous lipids in  
25 pyroptosis remains underappreciated. We discovered that 4-hydroxynonenal (HNE), a  
26 major endogenous product of lipid peroxidation, inhibited pyroptosis and inflammasome  
27 activation. HNE at physiological concentrations (3  $\mu$ M) blocked nigericin and ATP-  
28 induced cell death, as well as secretion of IL-1 $\beta$ , by mouse primary macrophages and  
29 human peripheral blood mononuclear cells. Treatment with HNE, or an increase of  
30 endogenous HNE by inhibiting glutathione peroxidase 4, reduced inflammasome  
31 activation in mouse models of acute lung injury and sepsis. Mechanistically, HNE  
32 inhibited the NLRP3 inflammasome activation independently of Nrf2 and NF- $\kappa$ B  
33 signaling, and had no effect on the AIM2 inflammasome. Furthermore, HNE directly  
34 bound to NLRP3 and inhibited its interaction with NEK7. Our findings identify HNE as a  
35 novel, endogenous inhibitor of the NLRP3 inflammasome.

## 36 **Main Text**

37

## 38 **Introduction**

39 Pyroptosis is a lytic form of programmed cell death, characterized by cytoplasmic  
40 swelling, pore formation in the cell membrane, and release of pro-inflammatory cytokines  
41 (1). Pyroptosis is initiated in response to pathogen-associated molecular patterns  
42 (PAMPs) and damage-associated molecular patterns (DAMPs) via pattern recognition  
43 receptors (PRRs) (2). Based on their location, PRRs are divided into membrane-bound  
44 PRRs and cytoplasmic PRRs. Toll-like receptors (TLRs) are transmembrane proteins  
45 that play important roles in the innate immune response (3). For example, activation of  
46 the TLR4 receptor by gram-negative bacteria endotoxins, such as lipopolysaccharide  
47 (LPS), stimulates multiple signaling pathways in macrophages, including NF- $\kappa$ B, and the  
48 subsequent production of pro-inflammatory cytokines (3). Unlike TLRs, the nucleotide-  
49 binding oligomerization domain-like receptors (NOD-like receptors, NLRs) recognize  
50 endogenous danger or stress responses, and form multiprotein complexes called  
51 inflammasomes (4-6). NLR Family Pyrin Domain Containing 3 (NLRP3), NLR family  
52 CARD domain-containing protein 4 (NLRC4) and Absent In Melanoma 2 (AIM2) are the  
53 best characterized inflammasomes, and have been implicated in the pathogenesis of  
54 sepsis, atherosclerosis, and acute lung injury (4-7). Stimulation of inflammasomes  
55 involves two signals: 1) transcriptional and posttranslational priming of inflammasome  
56 components, for example by LPS ; and 2) activation of inflammasome assembly by a cell  
57 danger signal, such as K<sup>+</sup> influx, extracellular ATP for NLRP3, or double-stranded DNA  
58 for AIM2. The formation of inflammasomes triggers the activation of caspase-1 and  
59 subsequent processing of interleukin-1 $\beta$  (IL-1 $\beta$ ) and interleukin-18 (IL-18) into their  
60 mature forms (8, 9). Gasdermin-D (GSDMD) was discovered as a pore-forming protein

61 and the final effector downstream of caspase-1 activation. Active caspases cleave  
62 GSDMD to generate an N-terminal cleavage product (GSDMD-NT) that forms  
63 transmembrane pores to enable IL-1 $\beta$  release and to drive pyroptosis (10-12). The  
64 importance of IL-1 $\beta$  as a disease mediator was confirmed by the CANTOS trial in which  
65 an IL-1 $\beta$  neutralizing antibody led to a lower rate of recurrent cardiovascular events in  
66 patients with previous myocardial infarction (13).

67         Recent data suggest that endogenous lipids or their oxidation products can  
68 activate or inhibit the assembly of inflammasomes (5, 14). Among reactive aldehydes  
69 derived from lipid peroxidation, 4-hydroxynonenal (HNE) is the most abundant end-  
70 product. The concentration of HNE in human serum is 0.05-0.15  $\mu$ M under physiological  
71 conditions (15). However, HNE levels may reach 3-6  $\mu$ M in tissues under oxidative  
72 stress (16, 17). Because of its high solubility in aqueous fluids, the reactive HNE formed  
73 in membranes can diffuse into the cytoplasm. HNE is detoxified by conjugation to  
74 glutathione by glutathione S-transferase (18, 19). However, some HNE molecules  
75 escape this mechanism and react with the side chains of cysteine, histidine and lysine  
76 residues in proteins (20-22). HNE thus has emerged as an important second messenger  
77 signaling molecule (18, 19). For example, low concentrations of HNE produce beneficial  
78 effects, including the stimulation of endogenous antioxidant defense mechanisms and  
79 the inhibition of inflammation (19, 23-26). Currently, two mechanisms are proposed for  
80 HNE-mediated regulation of inflammation. 1) HNE facilitates antioxidant expression by  
81 activating Nrf2 signaling, via disrupting Keap1-Nrf2 association and preventing Nrf 2  
82 degradation (24, 25, 27). Nrf2 stimulates antioxidant expression and increases the  
83 resistance to cytotoxic reactive oxygen species (ROS), thereby blocking multiple  
84 inflammatory pathways. 2). HNE blocks NF- $\kappa$ B activation by inhibiting I $\kappa$ B kinase (IKK)

85 activity, likely by covalently modifying cysteine residue(s) of IKK (26, 28). In this study  
86 we explored a novel mechanism by which the lipid peroxidation product HNE inhibits the  
87 NLRP3 inflammasome by directly disrupting the binding of NEK7 to NLRP3, thereby  
88 preventing activation of caspase-1. We demonstrate the importance of this pathway in  
89 decreasing inflammatory cytokine release and macrophage pyroptosis in vitro and in  
90 vivo.

## 91 **Results**

### 92 **HNE inhibits pyroptotic cell death in human and mouse macrophages.**

93 Nigericin is a K<sup>+</sup> ionophore that activates the NLRP3 inflammasome (29) and  
94 stimulates pyroptotic cell death. To study the role of HNE in pyroptosis, we used LPS co-  
95 incubated with HNE, followed by nigericin, in differentiated human THP-1 macrophages  
96 and mouse bone-marrow-derived macrophages (BMDMs). Cell death was confirmed by  
97 morphological changes, lactate dehydrogenase (LDH) release, and real-time nucleic  
98 acid staining (SYTOX<sup>TM</sup>). HNE treatment alone (3 μM) had no effect on cell death, but  
99 HNE significantly decreased the magnitude of LPS-nigericin stimulated cell death as  
100 indicated by membrane blebbing, LDH release, and nucleic acid staining in mouse and  
101 human macrophages (Fig. 1A-F). These results show that HNE protects macrophages  
102 from LPS/nigericin-mediated pyroptosis.

103

### 104 **HNE inhibits pyroptosis independent of Nrf2 signaling.**

105 Nrf2, an antioxidant transcription factor, has been proposed to regulate NLRP3  
106 inflammasome activation (30-32). Nrf2 function is inhibited by Keap1, which binds Nrf2,  
107 facilitates its degradation, and prevents its nuclear translocation (33). To study the

108 potential role of Nrf2 in HNE inhibition of pyroptosis, we first showed that HNE (3  $\mu$ M)  
109 induced Nrf2 activation in macrophages as indicated by its nuclear translocation (Fig.  
110 2A-B), whereas LPS did not. We next studied the effect of HNE on Nrf2 regulated genes,  
111 such as glutamate-cysteine ligase catalytic subunit (GCLC) and ferroportin-1 (Fig. 2C-D)  
112 (34). LPS treatment alone had no significant effect on any of these measurements (Fig.  
113 2C-D). Simultaneous treatment with LPS and HNE significantly increased Nrf2  
114 activation, compared to LPS alone (Fig. 2A-D). To determine if Nrf2 activation was  
115 required for HNE inhibition of pyroptosis, we blocked Nrf2 signaling using the specific  
116 inhibitor, ML385 (35) (Fig. S1A-B). We found that 3  $\mu$ M HNE still prevented cell death in  
117 the presence of ML385 (Fig. 2E-F), suggesting that the protective effect of HNE against  
118 pyroptosis was independent of the Nrf2 pathway.

#### 119 **HNE inhibits inflammasome activation independently of NF- $\kappa$ B signaling.**

120 Activation of the inflammasome involves first the NF- $\kappa$ B dependent stimulation of  
121 NLRP3 expression, and then NLRP3 oligomerization promoted by a cell danger signal,  
122 such as K<sup>+</sup> efflux or ATP (36). We first focused on the role of HNE in NF- $\kappa$ B signaling by  
123 assessing p65 phosphorylation, p65 nuclear translocation, and I $\kappa$ B- $\alpha$  degradation, as  
124 well as the expression of TNF- $\alpha$  and NLRP3 in macrophages treated with LPS. In  
125 response to LPS (100 ng/mL), there was a 3-fold increase in nuclear translocation of p65  
126 (Fig. 3A-B) and a 10-fold increase in phosphorylation of p65 (Fig. 3C). TNF- $\alpha$  and  
127 NLRP3 expression were induced after LPS treatment through the NF- $\kappa$ B pathway, but  
128 these measurements were not significantly affected by 3  $\mu$ M HNE (Fig. 3A-C, Fig. S2A-  
129 B). Similarly, there was no significant effect of HNE (0.3-3  $\mu$ M) on NLRP3, pro-IL-1 $\beta$ , and  
130 I $\kappa$ B- $\alpha$  protein expression (Fig. 3D-F, and Fig. S2D). Interestingly, HNE significantly  
131 reduced pro-IL-1 $\beta$  gene expression (Fig. S2C). Inflammasome activation induced by

132 nigericin triggers IL-1 $\beta$  cleavage in LPS-primed macrophages. To minimize the effects of  
133 HNE on NF- $\kappa$ B-dependent transcription, macrophages were treated with LPS for 3 hr  
134 before exposure to HNE (Fig. S2E) and then stimulated with nigericin (Fig. 3G). We  
135 found HNE still significantly prevented IL-1 $\beta$  maturation (Fig. 3H). Furthermore, we  
136 performed the experiments where BMDMs were pre-treated with HNE for 30 min, and  
137 then stimulated with nigericin after 10 min LPS priming. NLRP3 activation was confirmed  
138 by the cleavage of caspase-1 and GSDMD. We found that rapid NLRP3 priming followed  
139 by nigericin treatment induced caspase-1 and GSDMD cleavage, and HNE pre-  
140 treatment inhibited these effects (Fig. S3). Thus, the inhibitory effect of HNE treatment  
141 on inflammasome activation is independent of the NF- $\kappa$ B pathway.

142 **HNE inhibits NLRP3 inflammasome activation, but has no effect on AIM2 or**  
143 **NLRC4.**

144 We next studied the effect of HNE on inflammasome assembly and activation. It  
145 has been suggested that NLRP3 and apoptosis-associated speck-like (ASC) proteins  
146 are assembled by acetylated  $\alpha$ -tubulin-mediated transport to the microtubule organizing  
147 center (MTOC) (37). Upon inflammasome activation by nigericin stimulated potassium  
148 efflux, we found increased  $\alpha$ -tubulin acetylation in LPS primed peritoneal macrophages  
149 (Fig 4A), BMDMs (Fig. S4A), and THP1 macrophages (Fig. S4B). However, HNE had  
150 no effect on acetylation of  $\alpha$ -tubulin in these cells (Fig. 4A and Fig. S4A-B). These data  
151 suggest that acetylated  $\alpha$ -tubulin was not involved in HNE inhibition of pyroptosis.

152 To analyze the effects of HNE more broadly, we used both ATP and nigericin as  
153 a second signal to induce inflammasome activation (Fig. 4B-C). We also studied both  
154 peripheral blood mononuclear cells (PBMC) from healthy human donors, and peritoneal  
155 macrophages from mice. We confirmed that HNE inhibited IL-1 $\beta$  release (Fig. 4B-C).

156 Next, the effect of HNE on a non-potassium efflux dependent NLRP3 stimulus was  
157 tested. THP-1 macrophages were stimulated with LPS for 3 hr followed by R837  
158 (Imiquimod) for 1 hr. We found that HNE reduced IL-1 $\beta$  secretion (Fig. S5). These data  
159 indicated that HNE also inhibits non-potassium efflux-mediated NLRP3 activation.

160 It is known that upon NLRP3 inflammasome activation, the adaptor protein ASC  
161 is recruited by NLRP3 and forms large multimeric complexes, termed ASC specks (38).  
162 To determine the effect of HNE on ASC speck formation, we overexpressed an ASC-  
163 GFP fusion protein in THP-1-differentiated macrophages and stimulated them with LPS  
164 followed by nigericin. HNE treatment inhibited ASC speck formation, as indicated by  
165 reduced ASC speck immunofluorescence (Fig. 4D, and Fig. S6A-B). Similarly, HNE  
166 reduced large multimeric ASC complexes, as detected by western blot (Fig. 4E).

167 Inflammasome activation leads to the cleavage of pro-caspase-1 to generate  
168 active caspase-1 that cleaves gasdermin-D (GSDMD) to form membrane pores, which  
169 enables the release of cytokines, such as IL-1 $\beta$ . Therefore, we measured the effect of  
170 HNE on these parameters of inflammasome activation (Fig. 4F). LPS primed peritoneal  
171 macrophages were treated with HNE followed by nigericin or ATP. The inhibitory effect  
172 of HNE on NLRP3 activation was confirmed by western blot as shown by decreased  
173 cleavage of caspase-1, GSDMD, and IL-1 $\beta$  to their mature p20, p30, and p17 forms,  
174 respectively (Fig. 4F).

175 NLRP3, AIM2, and NLRC4 inflammasomes respond to different ligands or  
176 activators, but all engage with the adaptor protein ASC and activate protein caspase-1 to  
177 cleave pro-IL-1 $\beta$ . To study the specificity of HNE for the NLRP3 inflammasome, we  
178 tested the effect of HNE on the AIM2 and NLRC4 inflammasome. AIM2 is activated by  
179 cytosolic double-stranded DNA (dsDNA). NLRC4 is activated by cytosolic flagellin. To



180 determine the effect of HNE on these two inflammasomes, macrophages were treated  
181 with LPS for 3 hr, then HNE for 30 minutes, then transfection with poly(dA:dT) or flagellin  
182 for 6 hr and 3 hr, respectively. In contrast to the NLRP3 inflammasome, HNE did not  
183 reduce cleavage of caspase-1 or IL-1 $\beta$  release after AIM2 inflammasome activation (Fig.  
184 4G-H). Similarly, HNE did not reduce IL-1 $\beta$  release after NLRC4 inflammasome  
185 activation (Fig. S7). Together, these data show that HNE inhibits NLRP3 assembly and  
186 activation in mouse and human cells, but has no effect on AIM2 and NLRC4.

187 **HNE reduces non-canonical inflammasome-mediated IL-1 $\beta$  release, but has no**  
188 **effect on GSDMD-mediated cell death.**

189 Non-canonical inflammasome activation is dependent on caspase-11 (in mice) or  
190 caspase-4 (in humans) which directly bind with intracellular LPS (39, 40). Recent data  
191 suggest that the non-canonical inflammasome pathways play critical roles in acute lung  
192 injury and sepsis by sensing cytosolic LPS (41). To test whether HNE also affects non-  
193 canonical inflammasome activation, we transfected LPS into peritoneal macrophages in  
194 the presence or absence of HNE. IL-1 $\beta$  released into the medium and within whole cell  
195 lysates was collected 16 hr after transfection. Release of IL-1 $\beta$  into the medium and  
196 cleavage of IL-1 $\beta$  in the cell lysates were decreased 50% by HNE compared to control,  
197 but NLRP3 and pro-IL-1 $\beta$  protein levels did not change (Fig. 5A-B). Furthermore, HNE  
198 had no effect on Gasdermin-D (GSDMD) cleavage, but partially reduced IL-1 $\beta$   
199 maturation (Fig. 5B). Although caspase-11 is the major enzyme that cleaves GSDMD  
200 during non-canonical inflammasome activation, IL-1 $\beta$  maturation remains dependent on  
201 canonical NLRP3 activation (11). These data suggest that HNE targets NLRP3, but not  
202 caspase-11.

203           The assembly of the GSDMD pore requires cleavage of an autoinhibitory  
204 sequence present in the GSDMD- C-terminal domain (GSDMD-CT). This allows the N-  
205 terminal domain (GSDMD-NT) to bind to the inner leaflet of the plasma membrane,  
206 where it oligomerizes, and forms pores. Recent data show that Cys192 (Cys191 in  
207 humans) is critical for GSDMD-NT oligomerization (42). To test the possibility of a HNE  
208 effect on GSDMD-NT, and subsequent GSDMD-mediated cell death, we overexpressed  
209 GSDMD-NT in HEK293T cells. HNE was added after transfection. Overexpression of  
210 GSDMD-NT stimulated cell death, but HNE treatment did not protect the cells (Fig. 5C-  
211 D). Consistent with previous studies (42, 43), GSDMD-NT-C192A reduced cell death  
212 (Fig. 5D). Together, these results suggest that HNE specifically inhibits the NLRP3  
213 inflammasome, but not GSDMD cleavage associated cell death.

214 **HNE inhibits inflammasome activation by blocking the NLRP3-NEK7 interaction**  
215 **via a cysteine-dependent mechanism.**

216           The family of mammalian NIMA-related kinases 7 (NEK7) was recently identified  
217 as an NLRP3-binding protein that regulates NLRP3 oligomerization and activation (44-  
218 47). To detect a physical association between NEK7 and NLRP3, we performed co-  
219 immunoprecipitation assays. We found NEK7 was associated with NLRP3 after  
220 LPS/nigericin treatment, but the association was inhibited by HNE treatment (Fig, 6A  
221 and Fig. S8A-D). These results demonstrated that HNE reduced NLRP3 inflammasome  
222 activation by blocking the interaction between NLRP3 and NEK7.

223           To determine if HNE binds directly to NLRP3, we used a click chemistry-based  
224 approach. For this, we treated cells with alkyne-HNE (48), which can be activated by  
225 azido click chemistry to bind biotin. First, we compared the effects of HNE and alkyne-  
226 HNE on inflammasome activation. Like HNE, alkyne-HNE inhibited IL-1 $\beta$  release upon

227 NLRP3 inflammasome activation in a dose-dependent manner in peritoneal  
228 macrophages (Fig. 6B-C). Alkyne-HNE was 3 times less potent than HNE as measured  
229 by IL-1 $\beta$  release (3  $\mu$ M HNE vs 10  $\mu$ M alkyne-HNE). As anticipated, when LPS-primed  
230 macrophages were treated with alkyne-HNE, the cleavage of GSDMD and IL-1 $\beta$  were  
231 both inhibited in a dose dependent manner, as shown by increased pro-IL-1 $\beta$ , decreased  
232 GSDMD and cleaved IL-1 $\beta$  (Fig. 6D). We next assessed if alkyne-HNE can bind to  
233 NLRP3 by treating THP-1 macrophages with 3  $\mu$ M HNE or 10  $\mu$ M alkyne-HNE after  
234 inflammasome activation by nigericin. There were no significant differences in NLRP3  
235 protein expression from whole cell lysates between HNE or alkyne-HNE groups.  
236 However, by using alkyne-HNE and the azido click-chemistry technique, followed by a  
237 biotin-streptavidin pulldown, we found that alkyne-HNE pulled down significantly more  
238 NLRP3 than HNE treatment (Fig. 6E and Fig. S9). These data suggest that alkyne-HNE  
239 was capable of targeting NLRP3 during inflammasome activation.

240 HNE is highly electrophilic and may interact with NLRP3 cysteines by covalent  
241 modification. Indeed, when HNE or alkyne-HNE was co-incubated with N-acetylcysteine  
242 (NAC) that contains a reactive cysteine, which can inactivate cysteine-reactive  
243 metabolites, the ability of HNE to protect cells from nigericin-mediated cell death, IL-1 $\beta$   
244 release and MitoSOX nuclear accumulation was eliminated (Fig. 6F-H, and Fig. S10A-  
245 B). Furthermore, western blots indicated that alkyne-HNE-NLRP3 interaction was  
246 significantly decreased in the presence of NAC (Fig. 6I). 4-hydroxynonenal glutathione  
247 (HNE-GSH) is a major product formed by the reaction of HNE with GSH. To test if the  
248 reduced HNE is able to inhibit pyroptosis, we used LPS co-incubated with HNE-GSH,  
249 followed by nigericin in THP-1 macrophages. Cell death was confirmed by morphological  
250 changes, and LDH release. We found that HNE-GSH treatment alone (3 and 10  $\mu$ M) had

251 no effect on cell death compared to LPS/nigericin-treated cells (Fig. S11). These findings  
252 suggest that the interaction between HNE and NLRP3 is mediated by a cysteine  
253 dependent mechanism.

## 254 **HNE inhibits inflammasome activation in acute lung injury (ALI) and sepsis** 255 **models**

256 To test the ability of exogenous HNE to inhibit lung injury and inflammasome  
257 activation in vivo, we used the LPS induced ALI model (49-51). C57BL/6 mice were  
258 exposed to a single dose of saline, HNE, LPS or LPS+HNE by oropharyngeal delivery.  
259 Lung tissue and bronchoalveolar lavage (BAL) fluid were collected 3 hr and 18 hr after  
260 exposure to assess lung injury and the inflammatory response using myeloperoxidase  
261 (MPO) staining, Ly6G&6C staining, serum amyloid A-3 (SAA3) mRNA expression,  
262 cleaved IL-1 $\beta$  immunohistochemistry (IHC), as well as IL-1 $\beta$  and TNF- $\alpha$  secretion in BAL  
263 fluid. LPS delivery caused intense neutrophil and macrophage infiltration in the lung, and  
264 increased IL-1 $\beta$  staining (Fig. 7A-D, Fig. S12A). LPS delivery also stimulated IL-1 $\beta$   
265 secretion in the BAL fluid and total IL-1 $\beta$  production in lung homogenates (Fig. 7E-F).  
266 Simultaneous delivery of HNE with LPS significantly decreased all these markers of  
267 inflammasome activation compared to LPS alone (Fig. 7B-G), but had no effect on TNF-  
268  $\alpha$  (Fig. S12B) supporting that HNE was specific for NLRP3 inflammasome.

269 Sepsis is characterized by multi-organ dysfunction caused by an exaggerated  
270 immune response to infection (52). We characterized a clinically relevant, acute in vivo  
271 sepsis model to study the inflammasome pathway by using a combination of LPS and  
272 ATP (53). To test whether exogenous HNE could inhibit inflammasome activation in this  
273 model, C57BL/6 mice were injected with vehicle or HNE, 30 min before receiving LPS  
274 (10mg/kg, i.p.). Two hours later, mice were injected with ATP (Fig. 7H). Plasma and

275 peritoneal fluid were harvested 30 min after ATP injection for measurement of IL-1 $\beta$  and  
276 IL-18. Administration of HNE significantly reduced the levels of both cytokines (Fig. 7I-  
277 K). Collectively, these data show that HNE treatment reduces inflammasome activation  
278 in vivo in both ALI and sepsis models.

279 **Increasing endogenous HNE by the GPX4 inhibitor RSL3, reduces inflammasome**  
280 **activation in macrophages in vitro and in vivo**

281 HNE is one of the most abundant lipid peroxidation products (54). Excessive  
282 ROS reacts with the polyunsaturated fatty acids of lipid membranes and induces lipid  
283 peroxidation. Glutathione peroxidases (GPXs) are antioxidant enzymes that protect cells  
284 from lipid peroxidation (55). It is established that glutathione peroxidase-4 (GPX4)  
285 deficiency or inhibition enhances the production of endogenous HNE in vivo and in vitro  
286 (56-58). Indeed, the GPX4 inhibitor, RSL3, induced a dose-dependent increase of HNE  
287 in BMDMs (Fig. S13). To assess the effect of endogenous HNE in pyroptosis, we treated  
288 THP-1 macrophages and peritoneal macrophages with RSL3, after LPS-nigericin  
289 stimulation. RSL3 treatment significantly reduced cell death (Fig. 8A-B). RSL3 also  
290 inhibited GSDMD cleavage and IL-1 $\beta$  secretion in a dose-dependent manner (Fig. 8C-  
291 D). To test whether RSL3 treatment also inhibited inflammasome activation in vivo,  
292 C57BL/6 mice were injected with vehicle, or RSL3 (2mg/kg) before LPS and ATP  
293 challenge. Plasma and peritoneal fluid were harvested 30 min after ATP for  
294 measurement of IL-1 $\beta$ . We found that administration of RSL3 significantly reduced the  
295 levels of IL-1 $\beta$  in plasma and peritoneal fluid (Fig. 8E-F). Collectively, these data indicate  
296 that the accumulation of HNE, induced by GPX4 inhibition, decreased inflammasome  
297 activation in vitro macrophages and in a mouse sepsis model.

298

## 299 **Discussion**

300           The major finding in the present study was that the abundant lipid peroxidation  
301 product HNE selectively inhibited NLRP3 inflammasome activation in mouse and human  
302 macrophages. Three key results were: 1) HNE blocked NLRP3 inflammasome-mediated  
303 pyroptosis and IL-1 $\beta$  release in mouse macrophages and human PBMC, independent of  
304 Nrf2 and NF- $\kappa$ B signaling pathways. 2) HNE directly bound to NLRP3 and inhibited its  
305 interaction with NEK7. 3) HNE inhibited inflammasome activation in mouse acute lung  
306 injury and sepsis models. Our data suggest that HNE is not only a product of lipid  
307 peroxidation, but also plays an important role as a signaling molecule that inhibits  
308 inflammation at physiological concentrations (3-10  $\mu$ M) by regulating NLRP3  
309 inflammasome activation.

310           The mechanism we propose for the protective effect of HNE against pyroptosis is  
311 that it directly inhibits NLRP3 inflammasome activation by blocking NEK7-NLRP3  
312 interaction. Our data in support of this mechanism include: 1) HNE treatment of LPS-  
313 primed macrophages immediately before activation of NLRP3 with nigericin or ATP  
314 reduced IL-1 $\beta$  release, suggesting that HNE exerts its effect after the priming step. 2)  
315 HNE blocked ASC oligomerization and speck formation which is upstream of caspase-1,  
316 GSDMD, and IL-1 $\beta$  cleavage. 3) HNE had no effect on IL-1 $\beta$  secretion mediated by  
317 AIM2 and NLRC4 inflammasome activation, although NLRP3, NLRC4, and AIM2  
318 inflammasomes share the adaptor protein ASC and effector protein caspase-1. 4)  
319 Alkyne-HNE directly bound to NLRP3 in human and mouse macrophages. 5) HNE  
320 blocked NLRP3-NEK7 interaction. Therefore, we believe that the binding of HNE to  
321 NLRP3 is necessary and sufficient to inhibit NLRP3 inflammasome activation.

322           The NEK7-NLRP3 interaction is essential for NLRP3 assembly (44, 47), and  
323 subsequent ASC speck formation, caspase-1 activation, IL-1 $\beta$  release, and pyroptosis.

324 As previously reported, NEK7 depletion does not affect IL-1 $\beta$  release in macrophages  
325 when treated with poly(dA:dT) (44, 47). These data show that NEK7 is required for  
326 NLRP3 inflammasome activation, but not AIM2 inflammasome activation (44, 47),  
327 supporting our findings that HNE specifically targets NLRP3. A recent cryo-electron  
328 microscopy study revealed that NLRP3 interacts with NEK7 at leucine-rich repeat (LRR)  
329 and NACHT domains (46). Additional research will be needed to evaluate the structural  
330 mechanism for HNE-NLRP3 interaction.

331 Pyroptosis is characterized by cell swelling, membrane rupture, and release of  
332 inflammatory cytokines, such as IL-1 $\beta$  and IL-18 (59). In contrast to our study,  
333 Kauppinen et al. and Jin et al., showed that high concentrations of HNE (30-200  $\mu$ M)  
334 increased NLRP3 mRNA expression, IL-1 $\beta$ , and IL-18 secretion in human ARPE-19 cells  
335 after LPS stimulation (60, 61). We believe that the results obtained in these studies were  
336 due to HNE toxicity at concentrations 30-60-fold greater than in this present study.  
337 Therefore, we believe that physiological concentrations of HNE protect against  
338 pyroptosis and IL-1 $\beta$  release.

339 It has been hypothesized that ROS generation triggers NLRP3 inflammasome  
340 activation (62, 63) and pyroptosis (64). Nrf2 induction by HNE may stimulate the  
341 expression of potent antioxidant and cytoprotective proteins that increase the resistance  
342 to cytotoxic ROS. This mechanism was supported by evidence that electrophiles (such  
343 as sulforaphane, tert-butyl hydroquinone, dimethyl fumarate and itaconate) showed anti-  
344 inflammatory responses through Nrf2 pathways (65-69). However, we found that HNE  
345 inhibited pyroptosis independent of Nrf2 (Fig. 2E-F), suggesting the existence of another  
346 HNE mediated pathway for inhibition of NLRP3 inflammasome activation.

347 To determine the effect of HNE on cysteine reactive pathways, we measured the  
348 effects of HNE vs NAC on pyroptosis and IL-1 $\beta$  secretion (Fig. 6F-H), after nigericin

349 stimulation of LPS-primed THP-1 macrophages and BMDMs. Previous studies showed  
350 that NAC (>5mM ) inhibited NLRP3 responses in macrophages (70, 71), contradicting  
351 our data (Fig. 6F-H). We think the differences between these studies and our study is  
352 that we used only 0.5 mM NAC which had no effect on pyroptosis and IL-1 $\beta$  secretion. It  
353 has been shown that high concentration of NAC (> 5mM) inhibited transcription of  
354 NLRP3, but had no effect on activation (72, 73). Our results are supported by a recent  
355 publication indicating that 0.5 mM NAC alone had no effect on cell death after  
356 LPS+nigericin treatment, but was sufficient to reverse the protective effect of another  
357 cysteine-reactive drug, disulfiram, on pyroptosis (43). In our study, we found 0.5 mM  
358 NAC was sufficient to reverse the HNE effect suggesting that HNE inhibits NLRP3  
359 inflammasome through a cysteine dependent mechanism.

360 Previous studies suggested a role for HNE in regulating IL-1 $\beta$  secretion via NF-  
361  $\kappa$ B signaling in monocytes and macrophages when cells were treated with high dose  
362 HNE (25  $\mu$ M) prior to LPS stimulation (26, 74). In our study, neither translocation or  
363 phosphorylation of p65, nor protein expression of NLRP3 and I $\kappa$ B- $\alpha$  were altered by HNE  
364 treatment (0.3-3  $\mu$ M) after LPS stimulation (Fig. 3), suggesting a limited role for NF- $\kappa$ B. It  
365 is worth noting in previous studies that IL-1 $\beta$  secretion was extremely low, and there was  
366 no pyroptosis, because a second signal to induce NLRP3 activation was not included  
367 (26, 60, 74); which we have shown using nigericin or ATP.

368 Although transcriptional priming is required for NLRP3-mediated IL-1 $\beta$  secretion,  
369 our data (Fig. 3, and Fig. S3) and other studies have demonstrated that transcription is  
370 not necessary for NLRP3 activation (75, 76). Instead, posttranslational modifications  
371 including ubiquitination, phosphorylation, dephosphorylation and many other processes  
372 are essential for NLRP3 activation (77). For example, cyclic AMP promotes NLRP3  
373 ubiquitination through the E3 ubiquitin ligase MARCH7 (78), and protein kinase A (PKA)



374 directly phosphorylates Ser295 in NLRP3, which is critical for NLRP3 oligomerization  
375 (79). It is unclear how HNE affects the posttranslational modifications of NLRP3. Future  
376 studies on the mass spectrometric analysis of the NLRP3 inflammasome should identify  
377 the detailed mechanisms.

378 NLRP3 inflammasome activation plays an important role in the pathogenesis of  
379 acute lung injury (ALI) and sepsis (50, 52, 80). In the present study, we found that co-  
380 delivery of HNE with LPS to the lungs significantly reduced IL-1 $\beta$  cleavage and  
381 inflammatory cell infiltration. An important aspect of our work is that HNE is primarily an  
382 endogenous product of lipid peroxidation (16, 17). To determine the endogenous effect  
383 of HNE, we increased its levels in cells by inhibiting GPX4 (56-58). We found that  
384 peritoneal administration of HNE or the GPX4 inhibitor, RSL3, decreased IL-1 $\beta$  levels in  
385 peritoneal fluid and plasma after LPS-ATP challenge. These results suggest that both  
386 exogenous and endogenous HNE can inhibit NLRP3 inflammasome activation. A  
387 previous study by Kang et al. found that depletion of GPX4 from myeloid cells increased  
388 septic lethality (81), which contradicts our findings. It is possible that chronic GPX4  
389 deficiency may cause cell death due to accumulation of peroxidation, increased  
390 mitochondrial DNA and cytosolic ATP release, thereby triggering inflammasome  
391 activation and cell death.

392 In summary, our data indicate that HNE is not just a pathogenic mediator of  
393 oxidative stress (18, 54), but a novel endogenous inhibitor of NLRP3 inflammasome  
394 activation and subsequent inflammation. Regulation of HNE formation may represent a  
395 new therapeutic approach to inhibiting NLRP3 inflammasome activation, IL-1 $\beta$  secretion,  
396 and tissue inflammation.

397

398

399 **Materials and Methods**

400 **Animal**

401 Female and male C57BL/6J mice (Jackson Laboratory, 000664) aged 10-14 weeks were  
402 used in the experiments. All mice were housed in a specific pathogen-free facility and  
403 kept in a temperature-controlled room set to a light and dark cycle of 12 hours each. The  
404 mice had ad libitum access to standard mouse chow and water. No sample or animal  
405 was excluded from the experiments. Experiments with animals were blinded to the  
406 researcher assessing markers.

407 **Oropharyngeal administration of LPS and HNE**

408 Animals were randomly allocated to experimental groups. Age matched mice were  
409 anesthetized with ketamine (40 mg/kg) /xylazine (3 mg/kg). After respiratory rate was  
410 significantly decreased, the mouse was suspended by a rubber band on a 60° incline  
411 board. The oral cavity was exposed and the tongue was fully extended by forceps. Using  
412 a P200 micropipette, 50 µl physiological saline or 2mg/kg lipopolysaccharides (LPS)  
413 from *Escherichia coli* O127:B8, LPS (Sigma-Aldrich, L3129) with ethanol or 6µM HNE  
414 (Millipore Sigma, 393204) diluted in saline was instilled into the oropharyngeal space of  
415 mice. The nose was occluded and the tongue extended for 5 seconds following  
416 clearance of the liquid from the oropharynx. Animals were subsequently removed from  
417 the board and observed closely until fully recovered from anesthesia.

418 **Collection of bronchoalveolar lavage (BAL) fluid and lung tissue for protein and**

419 **RNA**

420 Mice were euthanized via intraperitoneal injection of ketamine (130 mg/kg) and xylazine  
421 (8.8mg/kg) before euthanasia. The upper part of the trachea was cannulated and then

422 lavaged with 1 mL followed by 0.5 mL of PBS supplemented with 1 mM UltraPure EDTA  
423 (Thermo Fisher Scientific, 15575-038). BAL fluid was centrifuged at 500 x g for 5 min at  
424 4°C and the supernatants were analyzed for cytokines and chemokines. The superior  
425 lobe, and inferior lobe were snap frozen in liquid nitrogen to quantify gene and protein  
426 expression. The superior lobe was homogenized in RTL lysis buffer (QIAGEN, 74106)  
427 and the inferior lobe was homogenized in cell lysis buffer (Cell Signaling Technology)  
428 supplemented with 5 mM sodium fluoride (Sigma-Aldrich) and protease inhibitor cocktail  
429 (Sigma-Aldrich. P8340). Protein levels were measured by Pierce™ BCA Protein Assay  
430 Kit (Thermo Fisher Scientific, 23225).

#### 431 **Collection of lung tissue for immunofluorescent staining**

432 Mice were euthanized via intraperitoneal injection of ketamine (130 mg/kg) and xylazine  
433 (8.8mg/kg). The lungs were perfused free of blood by gentle infusion of 10 ml PBS  
434 containing 1 mM EDTA through the right ventricle. Lungs were inflated with 2mL, PBS-  
435 equilibrated 4% formaldehyde (VWR International, PI28908). Lung tissues were  
436 removed, drop fixed in 4% formaldehyde, embedded in paraffin, cut into 5 µm sections,  
437 and mounted onto slides. Sections were deparaffinized before use. Sections were  
438 washed 3 times in PBS followed by antigen retrieval for 20 minutes with steam using 1X  
439 Citrate buffer (Millipore, 21545), pH=6.0. Sections were blocked in 10% normal goat  
440 serum (Vector Laboratories, S-1000) in PBS for 1 hour at room temperature followed by  
441 overnight incubation at 4°C with MPO antibody (Thermo Fisher Scientific, PA5-16672)  
442 1:500, cleaved IL-1β antibody (Thermo Fisher Scientific, PA5-105048) 1:500, or  
443 Ly6G&6C antibody (BD Biosciences, 550291) in 2% normal goat serum in PBS  
444 overnight. After three washes with PBS, fluorescence-conjugated secondary antibodies  
445 (Molecular Probes, A-11034 or A-11081) 1:1000 were incubated for 1 hour at room

446 temperature and followed by three washes with PBS. Nuclei were stained with DAPI-  
447 fluoromount-G (Southern Biotech, 0100-20). Fluorescent images were captured using a  
448 confocal microscope (Olympus BX51, Software: SPOT Imaging software advanced).  
449 MPO, IL-1 $\beta$ , Ly6G&6C and DAPI positive cells were quantified by using NIH ImageJ  
450 software.

#### 451 **In vivo sepsis model**

452 Sepsis was induced in C57BL/6J mice by intraperitoneal (IP) injection with LPS (10  
453 mg/kg) for 2 hr followed by 100 mM/100 $\mu$ l, pH 7.4 ATP (Sigma-Aldrich, A7699) IP  
454 injection as previously described (53). Animals were randomly allocated to experimental  
455 groups. Mice were IP injected with ethanol, HNE (2 mg/kg), DMSO, or RSL3 (2mg/kg)  
456 (Cayman Chemical Company, 19288) 0.5 hr before LPS. Blood samples and peritoneal  
457 fluid were collected at 30 min after ATP injection. Whole blood samples were collected in  
458 tubes with 10  $\mu$ L 500 mM EDTA and centrifuged at 1000 g for 10 min at 4°C. Plasma  
459 was collected and aliquoted for cytokine assay. Peritoneal fluids were harvested by  
460 washing mouse peritoneal cavity with 5 mL ice-cold PBS supplemented with 1mM  
461 EDTA. The cell suspension was centrifuged at 500 g for 5 min at 4°C, and the  
462 supernatant was collected and aliquoted for cytokine assay.

#### 463 **Peritoneal macrophage isolation**

464 Peritoneal macrophage isolation was performed as previously described (51, 82). One  
465 ml of sterile Bio-Gel P-100 polyacrylamide beads (Bio-Rad, 150-4174) in PBS (2% w/v)  
466 was injected IP into male and female C57BL/6J. Four days after injection, the animals  
467 were euthanized by CO<sub>2</sub> and macrophages were harvested by washing their peritoneal  
468 cavity with 7 mL ice-cold PBS supplemented with 1 mM EDTA. The cell suspension was

469 centrifuged at 500 g for 5 min at 4°C and the cell pellet was incubated with ACK lysing  
470 buffer (Thermo Fisher Scientific, A1049201) for 5 minutes to lyse the red cells. Cells  
471 were collected at 500 x g for 5 minutes then washed once in PBS. The cell pellet was  
472 resuspended in RPMI medium (Thermo Fisher Scientific, 11875-093) supplemented with  
473 10% FBS (Gibco, 10437-028), 1% streptomycin/penicillin (Gibco, 15140-122), and 1 mM  
474 sodium pyruvate (Thermo Fisher Scientific, 11360070). Macrophages were cultured at  
475  $1.6 \times 10^5$  cells/well in 12-well plates. After incubation for 2 hours, cells were washed  
476 twice with PBS and media was replenished. Cells were used for experiments after 24  
477 hours of culture.

478 **Bone marrow progenitor cell isolation and bone marrow-derived macrophage**  
479 **(BMDM) differentiation**

480 BMDMs preparation was performed as previously described (83). L929 conditioned  
481 media which contains the macrophage growth factor M-CSF, was prepared by culturing  
482 L929 cells (ATCC) in complete DMEM (Thermo Fisher Scientific, MT10013CV)  
483 supplemented with 10% FBS, and 1% penicillin and streptomycin for 10 days at 37°C,  
484 5% CO<sub>2</sub>. The L929 conditioned media, was collected, filtered (Vacuum Filter/Storage  
485 Bottle System, Corning, 431153), and stored at -80 °C until required. For isolation of  
486 BMDMs, tibias and femurs were removed from both male and female mice and flushed  
487 with media using a 26-gauge needle. Bone marrow was collected at 500 x g for 2 min at  
488 4 °C, resuspended with complete DMEM medium and filtered through a 70-µm cell  
489 strainer (VWR international, 10199-657). Bone marrow progenitor cells were cultured in  
490 100 mm dishes for 6-7 days in 70% complete DMEM medium and 30% L929-  
491 conditioned medium. Fresh medium (5 mL) was added on day 3. BMDMs were collected  
492 by scraping in cold PBS containing EDTA (1 mM). After centrifugation, BMDMs were

493 seeded into 12-well plates at a density of  $1.6 \times 10^5$  cells/well in DMEM and incubated  
494 overnight before use.

#### 495 **Human peripheral blood mononuclear cells (PBMC) isolation**

496 PBMC isolation was performed as previously described (84). Whole blood (20 mL) was  
497 layered upon a 15 mL Ficoll-Paque cushion (GE Healthcare, 17-1440-02) in 50 mL  
498 conical tubes, and centrifuged for 40 min at 400 x g at room temperature with the brake  
499 off. The layer of mononuclear cells at the plasma-density gradient medium interface was  
500 transferred to a new 50 mL conical tube, and 1x PBS was added to 45 ml total volume.  
501 Cells were centrifuged for 10 min at 2000 x g at room temperature and the remaining  
502 pellet of mononuclear cells was resuspended in complete RPMI medium at  $1.6 \times 10^5$   
503 cells/well in 12-well plates for future experiments.

#### 504 **THP-1 macrophage differentiation**

505 Human THP-1 monocytes were differentiated into macrophages by 24 hr incubation with  
506 100 nM PMA (Sigma-Aldrich) in complete RPMI medium at  $1.6 \times 10^5$  cells/well in 12-  
507 well plates. Cells were washed twice with 1x PBS and incubated with complete RPMI  
508 medium without PMA for 24 hr before experiment.

#### 509 **ASC-GFP-overexpressed THP-1 macrophage**

510 A lentivirus expressing the ASC-GFP fusion protein was prepared by transfection of  
511 pLEX-MCS-ASC-GFP (Addgene 73957), psPAX2, and p MD.2G using Fugene 6  
512 (Promega, PAE2693) in HEK293T cells. Culture medium was replaced after 24hr with  
513 fresh medium containing 5% FBS After a further 48 hrs virus containing medium was  
514 collected and stored in  $-80^{\circ}\text{C}$ . THP-1 monocytes at  $1.6 \times 10^5$  cells/well on 12-well plates

515 were infected with 400uL virus with polybrene (4 µg/ml) and centrifuged at 2500 rpm at  
516 20°C for 90min. Fresh complete RPMI medium with 100 nM PMA was added and  
517 followed by 24 hr incubation. Cells were washed twice with 1x PBS and incubated with  
518 complete RPMI medium without PMA for 24 hr before experiment.

#### 519 **Overexpressed GSDMD-NT HEK293T cells**

520 FLAG-GSDMD-NT (80951) and FLAG-GSDMD-NT-C192A (133891) were obtained from  
521 Addgene. HEK293T cells were cultured in complete DMEM medium containing 10%  
522 FBS and 1% Penicillin/Streptomycin. Transient transfection of HEK293T cells was  
523 performed using Fugene6 (Promega) according to the manufacturer's instructions.

#### 524 **HEK293As overexpressed with NLRP3, NEK7, and ASC-GFP**

525 HEK293A cells stably expressing mouse NLRP3 (Addgene 75127), and ASC-GFP  
526 (Addgene 73957) were established under G418 (1mg/ml) and puromycin (1µg/ml)  
527 selection following transfection with Fugene6. NEK7 (Addgene 75142) was expressed in  
528 the stable cell line by transient transfection using Fugene6 for 48 hours. Cell extracts  
529 were prepared after LPS/Nigericin treatment with or without HNE for 30 min.

#### 530 **LPS stimulation**

531 Macrophage cultures were rinsed twice with serum and antibiotic-free medium (RPMI  
532 1640 for peritoneal macrophages, THP-1 macrophages, and PBMCs or DMEM medium  
533 for BMDMs). Cells were exposed to LPS (100 ng/mL) for 3 hr with ethanol or HNE (0.3-3  
534 µM, Millipore Sigma, 393204) in appropriate growth media. For time-course studies,  
535 individual wells were exposed to LPS (100 ng/mL) for different times, but to minimize  
536 manipulation of each plate, the total incubation time was 3 hours for all treatments.

537 **Inflammasome stimulation**

538 To activate the NLRP3 inflammasome, cells were primed for 3 h with LPS (100 ng/mL)  
539 followed by addition of 2  $\mu$ M (BMDMs, peritoneal macrophages, PBMCs), 6 $\mu$ M (THP-1  
540 differentiated macrophages) nigericin (Sigma-Aldrich, N7143-5MG), 2 mM (peritoneal  
541 macrophages) ATP or 50  $\mu$ M (THP-1 differentiated macrophages) R837 (InvivoGen, tlr-  
542 imqs) for 30-60 min. To activate the AIM2 inflammasome, THP-1 macrophages or  
543 peritoneal macrophages were primed with LPS (100 ng/mL) for 3 hr followed by  
544 (Poly(dA:dT), 2  $\mu$ g/mL) for 6 hr using LyoVec<sup>TM</sup> (InvivoGen, tlr-patc) according to the  
545 manufacturer's protocol. To activate the NLRC4 inflammasome, BMDMs were primed  
546 with LPS (100 ng/mL) for 3 hr followed by (flagellin isolated from *P. aeruginosa*, 2 or 5  
547  $\mu$ g/mL) for 3 hr using FLA-PA Ultrapure (InvivoGen, tlr-pafla) according to the  
548 manufacturer's protocol. To activate the non-canonical inflammasome, peritoneal  
549 macrophages were stimulated with LPS (100 ng/mL) for 3 hr followed by intracellular  
550 LPS delivery (1  $\mu$ g/mL) by transfection using lipofectamine 2000 (Invitrogen, 11668027),  
551 according to the manufacturer's protocol, in OptiMEM (Gibco, 31985-070) for 16hr. HNE  
552 (0.3-10  $\mu$ M) (Millipore Sigma, 393204), alkyne-HNE (1-20  $\mu$ M) (Cayman Chemical,  
553 13265) or HNE-GSH (3-10  $\mu$ M) (Cayman Chemical Company, 10627) was added 30 min  
554 before the inflammasome activator.

555 **Cell morphology**

556 Micrographs of cell cultures were obtained under phase contrast illumination using 40X  
557 objective (Leica) prior to cell lysis. Multiple random fields were captured for each well.

558 **Cell death LDH assay**



559 Culture supernatants were collected and centrifuged at  $500 \times g$  for 5 min to remove  
560 cellular debris. LDH measurement was performed with the CyQUANT™ LDH cytotoxicity  
561 assay kit (Thermo Fisher Scientific, C20301) according to the manufacturer's  
562 instructions. Data were plotted normalizing the O.D. value obtained in wells treated with  
563 Triton X-100 (0.1%) as 100%.

#### 564 **Cell death by SYTOX™ green**

565 THP-1 macrophages or BMDMs were seeded in 96-well plates ( $2 \times 10^4$  cells/well) one day  
566 before the experiments. Cells were washed twice and incubated with LPS (100 ng/mL) in  
567 XF based medium (Agilent, 103334-100) supplemented with 4.5 g/L glucose, 2 mM  
568 glutamine, 1 mM sodium pyruvate, and 1 mM HEPES buffer at final pH7.4 for 3 hr. After  
569 3 hr LPS stimulation, SYTOX Green (final concentration  $1 \mu\text{M}$ ) (Thermo Fisher Scientific,  
570 S7020) was added together with nigericin ( $2 \mu\text{M}$  for BMDMs ;  $6 \mu\text{M}$  for THP-1  
571 macrophages) and fluorescence signals (Excitation wavelength: 485 nm, Emission  
572 wavelength: 550 nm) were analyzed using FLUOstar OPTIMA plate reader (BMG  
573 Labtech) at  $36^\circ\text{C}$  for 120 min. The percentage cell death was calculated by normalizing  
574 fluorescence signals from cells treated with Triton X-100 (0.1%).

#### 575 **Nuclear translocation of Nrf2 and p65**

576 Nrf2 or NF- $\kappa\text{B}$  p65 nuclear translocation was measured by immunofluorescence staining.  
577 THP-1 monocytes were seeded on glass coverslips in 12- well plates and differentiated  
578 as described above. Cells were treated with LPS (Nrf2 for 3 hr; p65 for 1 hr) and were  
579 washed twice with cold PBS and fixed with 4% formaldehyde in PBS for 10 min. After  
580 washing with PBS, the cells were incubated with blocking solution (10% normal goat  
581 serum, and 0.1% Triton X-100 in PBS) for 1 h followed by incubating with the Nrf2

582 (Abcam, ab31163) 1:500; NF- $\kappa$ B p65 (D14E12) (Cell Signaling Technology, 8242) 1:500;  
583 antibody overnight. Cells were washed three times with PBS and incubated with the goat  
584 anti-rabbit IgG (H+L) secondary antibody, alexa fluor 488 (Thermo Fisher Scientific, A-  
585 11034) for 1 h in PBS in the dark. After three washes with PBS, samples were mounted  
586 using fluoromount-G-DAPI (SouthernBiotech, 0100-20). Immunofluorescence was  
587 analyzed by confocal microscopy. Nuclear translocation was evaluated using NIH  
588 ImageJ software with an intensity ratio nuclei cytoplasm macro. Quantification of  
589 translocation was expressed as the percentage of intensity in nucleus over total cell (85).  
590 The data points shown are from 3 separate experiments with duplicate or triplicate wells.  
591 Around 200 cells from at least 6 images were quantified for each experimental group.

## 592 **Cytokine and HNE assays**

593 Plasma, BAL fluid and peritoneal fluid levels of IL-1  $\beta$  (Invitrogen 88-7013-22), IL-18  
594 (Invitrogen, BMS618-3) and TNF- $\alpha$  (BioLegend, 430904) collected from mouse studies  
595 were determined by ELISA kits according to the manufacturer's instructions. For in vitro  
596 studies, culture media was collected immediately after treatment. Samples were cleared  
597 by centrifugation at 16,000  $\times$ g for 5 min and stored at  $-20$  °C. HNE (MyBioSource.com,  
598 MBS7606509), Human and mouse IL-1  $\beta$  (BioLegend, 437004 and 432604) were  
599 measured in culture supernatants by ELISA.

## 600 **RNA extraction and Real-time PCR**

601 RNA was extracted from lung tissue or cultured cells using RNeasy kit (Qiagen, 74106)  
602 according to the manufacturer's instructions. Complementary DNA was synthesized from  
603 0.5  $\mu$ g RNA by iScript™ cDNA Synthesis Kit (Bio-Rad, 1708891). Amplification reactions  
604 contained a target specific fraction of cDNA and 1  $\mu$ M forward and reverse primers in

605 iQ™ SYBR® Green Supermix (Bio-Rad, 1708882). Fluorescence was monitored and  
606 analyzed in a CFX connect real-time PCR system (Bio-Rad). Gene expression was  
607 normalized to  $\beta$ -actin using the delta delta cycle threshold method. Amplification of  
608 specific transcripts was confirmed by melting curve analysis at the end of each PCR  
609 experiment. The primers used are as follows: Mouse GCLC (Forward:  
610 AGATGATAGAACACGGGAGGAG , Reverse: TGATCCTAAAGCGATTGTTCTTC);  
611 Mouse Ferroportin-1(Forward: ACCCATCCCCATAGTCTCTGT, Reverse:  
612 ACCGTCAAATCAAAGGACCA); Mouse  $\beta$ -actin (Forward:  
613 TTCAACACCCCAGCCATGT, Reverse: GTAGATGGGCACAGTGTGGGT); Mouse IL-  
614 1 $\beta$ (Forward: GAGTGTGGATCCCAAGCAAT, Reverse: ACGGATTCCATGGTGAAGTC);  
615 Mouse IL-6 (Forward: GAGGATACCACTCCCAACAGACC, Reverse:  
616 AAGTGCATCATCGTTGTTTCATACA); Mouse TNF- $\alpha$  (Forward:  
617 TCTTCTCATTCTGCTTGTGG, Reverse: GGTCTGGGCCATAGAACTGA); Mouse  
618 NLRP3 (Forward: TTCCCAGACACTCATGTTGC, Reverse:  
619 AGAAGAGACCACGGCAGAAG); SAA3 (Forward: TTTCTCTTCTGTTGTTCCCAGTC,  
620 Reverse: TCACAAGTATTTATTCAGCACATTGGGA)

## 621 **Western blot**

622 Proteins were separated by SDS-PAGE through 10% acrylamide gels and transferred to  
623 nitrocellulose membranes, blocked with 5% nonfat dry milk in Tween-TBS and reacted  
624 with the indicated antibody: NLRP3 (AdipoGen, AG-20B-0014-C100) 1:1000; Caspase-  
625 1(AdipoGen, AG-20B-0042-C100) 1:1000; GSDMD (Abcam, ab209845) 1:1000; IL-1 $\beta$   
626 (GeneTex, GTX10750) 1:2000; ASC (Santa Cruz Biotechnology, sc-514414) 1:1000;  
627 GAPDH (Millipore, MAB374) 1:2000  $\beta$ -actin (Cell Signaling Technology, 4970) 1:4000;  
628 Phospho-NF- $\kappa$ B p65 (Ser536) (93H1) (Cell Signaling Technology, 3033S) 1:1000; I $\kappa$ B- $\alpha$

629 (L35A5) (Cell Signaling Technology, 4814) 1:1000; Acetyl- $\alpha$ -Tubulin (Lys40) (5335T)  
630 1:1000; NEK7 (Abcam, ab133514) 1:1000 overnight. Membranes were rinsed and  
631 incubated with horseradish peroxidase conjugated secondary antibody (Anti-mouse IgG,  
632 HRP-linked Antibody (Cell Signaling Technology, 7076), Anti-rabbit IgG, HRP-linked  
633 Antibody (Cell Signaling Technology, 7074), Anti-goat IgG, HRP-linked Antibody  
634 (Jackson Immuno Research, 805-035-180). Reactive proteins were detected by  
635 enhanced chemiluminescence, visualized by exposure to radiographic film and  
636 quantified by scanning densitometry normalized to  $\beta$ -actin expression measured in each  
637 sample on the same gel.

#### 638 **ASC speck formation**

639 ASC-GFP-expressing THP-1 differentiated macrophages were seeded on glass  
640 coverslips in 12- well plates. Cells were incubated with 100 ng/ml LPS for 3 hr followed  
641 by incubation with 6  $\mu$ M nigericin for 2 h. Cells were fixed in 4% paraformaldehyde for 10  
642 min. After three washes with 1x PBS, cells were mounted using fluoromount-G-DAPI.  
643 Immunofluorescence was analyzed by confocal microscope. The GFP 488 nm  
644 fluorescent signals were acquired by confocal microscopy. The data points represent  
645 biological replicates from 3 separate experiments. Around 200 cells from at least 6  
646 images were quantified for each experimental group.

#### 647 **ASC oligomerization**

648 For ASC oligomer cross-linking, cells were lysed in buffer (0.5% Triton  $\times$  100, 20 mM  
649 HEPES-KOH, pH 7.5, 150 mM KCl, and complete protease and phosphatase inhibitor  
650 cocktail) on ice by syringing 10 times through a G26 needle. The cell lysates were  
651 centrifuged at 6000 rpm at 4  $^{\circ}$ C for 10 min. The pellets were resuspended in PBS and

652 crosslinked with 2mM disuccinimidyl suberate (Thermo Fisher Scientific, 21655). The  
653 cross-linked pellets were centrifuged at 15000 rpm for 15 min and dissolved directly in a  
654 1x SDS sample buffer.

#### 655 **MitoSOX red imaging**

656 THP-1 differentiated macrophages were seeded on glass coverslips in 12- well plates.  
657 Cells were incubated with 100 ng/ml LPS for 3 hr followed by incubation with 2  $\mu$ M  
658 Mitosox red (Thermo Fisher Scientific, M36008) for 30min. Cells were washed twice with  
659 medium and stimulated with nigericin for 1 hr. Cells were fixed in 4% paraformaldehyde  
660 for 10 min. After three washes with 1x PBS, cells were mounted using fluoromount-G-  
661 DAPI. Immunofluorescence was analyzed by confocal microscope. The 510/580 nm  
662 fluorescent signals were acquired by confocal microscopy.

#### 663 **Click chemistry and biotin affinity precipitation**

664 Cells were lysed in IP Lysis buffer (20 mM HEPES-KOH, 150 mM NaCl, and 0.5% v/v  
665 Triton-100x) containing protease inhibitor cocktail, and treated with 10 mM sodium  
666 borohydride (Sigma-Aldrich, 452882) for 30 min. Click-chemistry was performed with  
667 Molecular Probes Click iT Protein Reaction Buffer Kit (Thermo Fisher Scientific, C10276)  
668 according to the manufacturer's instructions. Briefly, The Cu(I)-catalyzed click reaction  
669 was initiated by adding Click-iT reaction buffer and 50  $\mu$ l of Azide-PEG3-biotin in 50 mM  
670 (Cayman Chemical, 23419) to each sample and incubated on a rotator for 20 min at  
671 room temperature. Protein was precipitated and the pellet was washed once with 100  $\mu$ l  
672 of ice-cold methanol and centrifuged at 15,000 x g for 5 min. Methanol was removed and  
673 the pellets were re-suspended in 50  $\mu$ l IP Lysis buffer containing protease inhibitor  
674 cocktail. Protein concentrations were estimated assuming no protein loss occurred

675 during the click and precipitation procedure. To perform biotin affinity precipitation,  
676 clicked lysates were loaded with 20  $\mu$ l of Dynabeads™ MyOne™ Streptavidin C1  
677 (Invitrogen, 65001). The Dynabeads were equilibrated to buffer by three 100  $\mu$ l washes.  
678 Thirty micrograms of “clicked” lysates were loaded onto the equilibrated beads. The  
679 volume was brought up to 100  $\mu$ l with IP lysis buffer, and lysates were incubated with  
680 beads for 1 h at room temperature on a rotator. After incubation, the beads were washed  
681 six times with 100  $\mu$ l volumes of IP lysis buffer. The bound proteins were eluted using  
682 100  $\mu$ l of 1X sample lysis buffer, by vortexing and heating at 95 °C for 10 min. The  
683 supernatant was collected and stored at -20 °C for western blot analysis.

#### 684 **Co-immunoprecipitation**

685 Cells were lysed in IP buffer on ice by syringing 10 times through a G26 needle. The  
686 supernatant was collected as the whole cell lysate (WCL) sample. One mg total protein  
687 from WCL was incubated with anti-NEK7 antibody (Abcam, ab133514), anti-NLRP3  
688 antibody (AdipoGen, AG-20B-0014-C100), ChromPure Rabbit IgG (Jackson Immuno  
689 Research, 011-000-003), or ChromPure Mouse IgG (Jackson Immuno Research, 015-  
690 000-00) overnight. Agarose beads (Roche, C755B62) was added to the remaining  
691 supernatant, which was subsequently incubated at 4°C in a ferris wheel mixer for 3 hr. IP  
692 samples were subsequently centrifuged at 200 x g for 2 min at 4°C, supernatant  
693 removed, and beads washed five times with 1 mL low stringency lysis buffer. The  
694 immune complexes were eluted by addition of 100  $\mu$ L of 1X sample lysis buffer, boiled  
695 for 5 min and analyzed by western blot.

696

#### 697 **Statistics**

698 Unless otherwise noted, in vitro experiments were repeated as three independent  
699 procedures, with duplicate or triplicate wells averaged prior to statistical analysis. All  
700 data were presented as mean  $\pm$  SD. GraphPad Prism 8.0 was used for statistical  
701 analysis. Comparisons between two groups after stimulation were analyzed by two-way  
702 ANOVA. HNE dose response experiments in cell cultures were analyzed by one-way  
703 ANOVA followed by post hoc T tests using Bonferroni correction for multiple  
704 comparisons. P values were indicated as follow: \* < 0.05, \*\* < 0.01, \*\*\* < 0.001, \*\*\*\* <  
705 0.0001.

706

707

## 708 **References**

709

- 710 1. B. A. McKenzie, V. M. Dixit, C. Power, Fiery Cell Death: Pyroptosis in the Central  
711 Nervous System. *Trends in neurosciences* **43**, 55-73 (2020).
- 712 2. A. Aderem, R. J. Ulevitch, Toll-like receptors in the induction of the innate  
713 immune response. *Nature* **406**, 782-787 (2000).
- 714 3. R. J. Ulevitch, P. S. Tobias, Recognition of gram-negative bacteria and endotoxin  
715 by the innate immune system. *Curr Opin Immunol* **11**, 19-22 (1999).
- 716 4. P. Samir *et al.*, DDX3X acts as a live-or-die checkpoint in stressed cells by  
717 regulating NLRP3 inflammasome. *Nature* **573**, 590-594 (2019).
- 718 5. P. Duewell *et al.*, NLRP3 inflammasomes are required for atherogenesis and  
719 activated by cholesterol crystals. *Nature* **464**, 1357-1361 (2010).
- 720 6. C. Dostert *et al.*, Innate immune activation through Nalp3 inflammasome sensing  
721 of asbestos and silica. *Science* **320**, 674-677 (2008).
- 722 7. S. M. Man, T. D. Kanneganti, Regulation of inflammasome activation. *Immunol*  
723 *Rev* **265**, 6-21 (2015).
- 724 8. T. Strowig, J. Henao-Mejia, E. Elinav, R. Flavell, Inflammasomes in health and  
725 disease. *Nature* **481**, 278-286 (2012).
- 726 9. H. Guo, J. B. Callaway, J. P. Ting, Inflammasomes: mechanism of action, role in  
727 disease, and therapeutics. *Nat Med* **21**, 677-687 (2015).
- 728 10. W. T. He *et al.*, Gasdermin D is an executor of pyroptosis and required for  
729 interleukin-1beta secretion. *Cell Res* **25**, 1285-1298 (2015).
- 730 11. N. Kayagaki *et al.*, Caspase-11 cleaves gasdermin D for non-canonical  
731 inflammasome signalling. *Nature* **526**, 666-671 (2015).
- 732 12. J. Shi *et al.*, Cleavage of GSDMD by inflammatory caspases determines  
733 pyroptotic cell death. *Nature* **526**, 660-665 (2015).

- 734 13. P. M. Ridker *et al.*, Antiinflammatory Therapy with Canakinumab for  
735 Atherosclerotic Disease. *N Engl J Med* **377**, 1119-1131 (2017).
- 736 14. J. J. Liang, I. D. C. Fraser, C. E. Bryant, Lipid regulation of NLRP3  
737 inflammasome activity through organelle stress. *Trends Immunol*  
738 10.1016/j.it.2021.07.005 (2021).
- 739 15. L. Gil *et al.*, Age-associated analysis of oxidative stress parameters in human  
740 plasma and erythrocytes. *Free Radic Res* **40**, 495-505 (2006).
- 741 16. W. G. Siems, T. Grune, H. Esterbauer, 4-Hydroxynonenal formation during  
742 ischemia and reperfusion of rat small intestine. *Life Sci* **57**, 785-789 (1995).
- 743 17. R. J. Schaur, W. Siems, N. Bresgen, P. M. Eckl, 4-Hydroxy-nonenal-A Bioactive  
744 Lipid Peroxidation Product. *Biomolecules* **5**, 2247-2337 (2015).
- 745 18. Y. C. Awasthi, K. V. Ramana, P. Chaudhary, S. K. Srivastava, S. Awasthi,  
746 Regulatory roles of glutathione-S-transferases and 4-hydroxynonenal in stress-  
747 mediated signaling and toxicity. *Free Radic Biol Med* **111**, 235-243 (2017).
- 748 19. S. Dalleau, M. Baradat, F. Gueraud, L. Huc, Cell death and diseases related to  
749 oxidative stress: 4-hydroxynonenal (HNE) in the balance. *Cell Death Differ* **20**,  
750 1615-1630 (2013).
- 751 20. M. Jaganjac *et al.*, The relevance of pathophysiological alterations in redox  
752 signaling of 4-hydroxynonenal for pharmacological therapies of major stress-  
753 associated diseases. *Free Radic Biol Med* **157**, 128-153 (2020).
- 754 21. A. Vila *et al.*, Identification of protein targets of 4-hydroxynonenal using click  
755 chemistry for ex vivo biotinylation of azido and alkynyl derivatives. *Chem Res*  
756 *Toxicol* **21**, 432-444 (2008).
- 757 22. A. Van Hall-Beauvais, Y. Zhao, D. A. Urul, M. J. C. Long, Y. Aye, Single-Protein-  
758 Specific Redox Targeting in Live Mammalian Cells and *C. elegans*. *Curr Protoc*  
759 *Chem Biol* **10**, e43 (2018).
- 760 23. D. P. Abulafia *et al.*, Inhibition of the inflammasome complex reduces the  
761 inflammatory response after thromboembolic stroke in mice. *J Cereb Blood Flow*  
762 *Metab* **29**, 534-544 (2009).
- 763 24. R. C. Siow, T. Ishii, G. E. Mann, Modulation of antioxidant gene expression by 4-  
764 hydroxynonenal: atheroprotective role of the Nrf2/ARE transcription pathway.  
765 *Redox Rep* **12**, 11-15 (2007).
- 766 25. T. Ishii *et al.*, Role of Nrf2 in the regulation of CD36 and stress protein expression  
767 in murine macrophages: activation by oxidatively modified LDL and 4-  
768 hydroxynonenal. *Circ Res* **94**, 609-616 (2004).
- 769 26. S. Page *et al.*, 4-Hydroxynonenal prevents NF-kappaB activation and tumor  
770 necrosis factor expression by inhibiting I kappa B phosphorylation and subsequent  
771 proteolysis. *J Biol Chem* **274**, 11611-11618 (1999).
- 772 27. Y. Zhang *et al.*, 4-hydroxy-2-nonenal protects against cardiac ischemia-  
773 reperfusion injury via the Nrf2-dependent pathway. *J Mol Cell Cardiol* **49**, 576-  
774 586 (2010).
- 775 28. A. C. Timucin, H. Basaga, Pro-apoptotic effects of lipid oxidation products: HNE  
776 at the crossroads of NF-kappaB pathway and anti-apoptotic Bcl-2. *Free Radic*  
777 *Biol Med* **111**, 209-218 (2017).
- 778 29. S. Mariathasan *et al.*, Cryopyrin activates the inflammasome in response to  
779 toxins and ATP. *Nature* **440**, 228-232 (2006).
- 780 30. P. Hennig *et al.*, The Crosstalk between Nrf2 and Inflammasomes. *Int J Mol Sci*  
781 **19** (2018).



- 782 31. M. Garstkiewicz *et al.*, Opposing effects of Nrf2 and Nrf2-activating compounds  
783 on the NLRP3 inflammasome independent of Nrf2-mediated gene expression.  
784 *Eur J Immunol* **47**, 806-817 (2017).
- 785 32. C. Zhao, D. D. Gillette, X. Li, Z. Zhang, H. Wen, Nuclear factor E2-related factor-  
786 2 (Nrf2) is required for NLRP3 and AIM2 inflammasome activation. *J Biol Chem*  
787 **289**, 17020-17029 (2014).
- 788 33. H. Motohashi, M. Yamamoto, Nrf2-Keap1 defines a physiologically important  
789 stress response mechanism. *Trends Mol Med* **10**, 549-557 (2004).
- 790 34. X. Song, D. Long, Nrf2 and Ferroptosis: A New Research Direction for  
791 Neurodegenerative Diseases. *Front Neurosci* **14**, 267 (2020).
- 792 35. A. Singh *et al.*, Small Molecule Inhibitor of NRF2 Selectively Intervenes  
793 Therapeutic Resistance in KEAP1-Deficient NSCLC Tumors. *ACS Chem Biol* **11**,  
794 3214-3225 (2016).
- 795 36. E. K. Jo, J. K. Kim, D. M. Shin, C. Sasakawa, Molecular mechanisms regulating  
796 NLRP3 inflammasome activation. *Cellular & molecular immunology* **13**, 148-159  
797 (2016).
- 798 37. T. Misawa *et al.*, Microtubule-driven spatial arrangement of mitochondria  
799 promotes activation of the NLRP3 inflammasome. *Nat Immunol* **14**, 454-460  
800 (2013).
- 801 38. A. Stutz, G. L. Horvath, B. G. Monks, E. Latz, ASC speck formation as a readout  
802 for inflammasome activation. *Methods Mol Biol* **1040**, 91-101 (2013).
- 803 39. N. Kayagaki *et al.*, Non-canonical inflammasome activation targets caspase-11.  
804 *Nature* **479**, 117-121 (2011).
- 805 40. N. Carpe *et al.*, Maternal allergen exposure reprograms the developmental lung  
806 transcriptome in atopic and normoresponsive rat pups. *Am J Physiol Lung Cell*  
807 *Mol Physiol* **303**, L899-911 (2012).
- 808 41. K. T. Cheng *et al.*, Caspase-11-mediated endothelial pyroptosis underlies  
809 endotoxemia-induced lung injury. *J Clin Invest* **127**, 4124-4135 (2017).
- 810 42. X. Liu *et al.*, Inflammasome-activated gasdermin D causes pyroptosis by forming  
811 membrane pores. *Nature* **535**, 153-158 (2016).
- 812 43. J. J. Hu *et al.*, FDA-approved disulfiram inhibits pyroptosis by blocking gasdermin  
813 D pore formation. *Nat Immunol* **21**, 736-745 (2020).
- 814 44. Y. He, M. Y. Zeng, D. Yang, B. Motro, G. Nunez, NEK7 is an essential mediator  
815 of NLRP3 activation downstream of potassium efflux. *Nature* **530**, 354-357  
816 (2016).
- 817 45. J. L. Schmid-Burgk *et al.*, A Genome-wide CRISPR (Clustered Regularly  
818 Interspaced Short Palindromic Repeats) Screen Identifies NEK7 as an Essential  
819 Component of NLRP3 Inflammasome Activation. *J Biol Chem* **291**, 103-109  
820 (2016).
- 821 46. H. Sharif *et al.*, Structural mechanism for NEK7-licensed activation of NLRP3  
822 inflammasome. *Nature* **570**, 338-343 (2019).
- 823 47. H. Shi *et al.*, NLRP3 activation and mitosis are mutually exclusive events  
824 coordinated by NEK7, a new inflammasome component. *Nat Immunol* **17**, 250-  
825 258 (2016).
- 826 48. C. G. Parker, M. R. Pratt, Click Chemistry in Proteomic Investigations. *Cell* **180**,  
827 605-632 (2020).
- 828 49. S. Wang *et al.*, Blockage of P2X7 attenuates acute lung injury in mice by  
829 inhibiting NLRP3 inflammasome. *Int Immunopharmacol* **27**, 38-45 (2015).

- 830 50. G. dos Santos *et al.*, Vimentin regulates activation of the NLRP3 inflammasome.  
831 *Nat Commun* **6**, 6574 (2015).
- 832 51. C. G. Hsu, F. Fazal, A. Rahman, B. C. Berk, C. Yan, Phosphodiesterase 10A Is a  
833 Key Mediator of Lung Inflammation. *J Immunol* 10.4049/jimmunol.2001026  
834 (2021).
- 835 52. L. G. Danielski, A. D. Giustina, S. Bonfante, T. Barichello, F. Petronilho, The  
836 NLRP3 Inflammasome and Its Role in Sepsis Development. *Inflammation* **43**, 24-  
837 31 (2020).
- 838 53. R. J. Griffiths, E. J. Stam, J. T. Downs, I. G. Otterness, ATP induces the release  
839 of IL-1 from LPS-primed cells in vivo. *J Immunol* **154**, 2821-2828 (1995).
- 840 54. M. Csala *et al.*, On the role of 4-hydroxynonenal in health and disease. *Biochim*  
841 *Biophys Acta* **1852**, 826-838 (2015).
- 842 55. R. Brigelius-Flohe, M. Maiorino, Glutathione peroxidases. *Biochim Biophys Acta*  
843 **1830**, 3289-3303 (2013).
- 844 56. M. Jia *et al.*, Redox homeostasis maintained by GPX4 facilitates STING  
845 activation. *Nat Immunol* **21**, 727-735 (2020).
- 846 57. C. W. Brown, P. Chhoy, D. Mukhopadhyay, E. R. Karner, A. M. Mercurio,  
847 Targeting prominin2 transcription to overcome ferroptosis resistance in cancer.  
848 *EMBO Mol Med* 10.15252/emmm.202013792, e13792 (2021).
- 849 58. R. Shintoku *et al.*, Lipoxygenase-mediated generation of lipid peroxides  
850 enhances ferroptosis induced by erastin and RSL3. *Cancer Sci* **108**, 2187-2194  
851 (2017).
- 852 59. K. Schroder, J. Tschopp, The inflammasomes. *Cell* **140**, 821-832 (2010).
- 853 60. A. Kauppinen *et al.*, Oxidative stress activates NLRP3 inflammasomes in ARPE-  
854 19 cells--implications for age-related macular degeneration (AMD). *Immunol Lett*  
855 **147**, 29-33 (2012).
- 856 61. X. Jin *et al.*, Cyanidin-3-glucoside Alleviates 4-Hydroxyhexenal-Induced NLRP3  
857 Inflammasome Activation via JNK-c-Jun/AP-1 Pathway in Human Retinal  
858 Pigment Epithelial Cells. *J Immunol Res* **2018**, 5604610 (2018).
- 859 62. R. Zhou, A. S. Yazdi, P. Menu, J. Tschopp, A role for mitochondria in NLRP3  
860 inflammasome activation. *Nature* **469**, 221-225 (2011).
- 861 63. K. Schroder, R. Zhou, J. Tschopp, The NLRP3 inflammasome: a sensor for  
862 metabolic danger? *Science* **327**, 296-300 (2010).
- 863 64. C. L. Evavold *et al.*, Control of gasdermin D oligomerization and pyroptosis by  
864 the Regulator-Rag-mTORC1 pathway. *Cell* 10.1016/j.cell.2021.06.028 (2021).
- 865 65. E. L. Mills *et al.*, Itaconate is an anti-inflammatory metabolite that activates Nrf2  
866 via alkylation of KEAP1. *Nature* **556**, 113-117 (2018).
- 867 66. S. Ghosh *et al.*, Inflammation-induced behavioral changes is driven by alterations  
868 in Nrf2-dependent apoptosis and autophagy in mouse hippocampus: Role of  
869 fluoxetine. *Cell Signal* **68**, 109521 (2020).
- 870 67. Z. Dong *et al.*, Sulforaphane Protects Pancreatic Acinar Cell Injury by Modulating  
871 Nrf2-Mediated Oxidative Stress and NLRP3 Inflammatory Pathway. *Oxidative*  
872 *medicine and cellular longevity* **2016**, 7864150 (2016).
- 873 68. X. Liu *et al.*, Nuclear Factor E2-Related Factor-2 Negatively Regulates NLRP3  
874 Inflammasome Activity by Inhibiting Reactive Oxygen Species-Induced NLRP3  
875 Priming. *Antioxid Redox Signal* **26**, 28-43 (2017).
- 876 69. X. Liu *et al.*, Dimethyl fumarate ameliorates dextran sulfate sodium-induced  
877 murine experimental colitis by activating Nrf2 and suppressing NLRP3  
878 inflammasome activation. *Biochem Pharmacol* **112**, 37-49 (2016).

- 879 70. H. Wen *et al.*, Fatty acid-induced NLRP3-ASC inflammasome activation  
880 interferes with insulin signaling. *Nat Immunol* **12**, 408-415 (2011).
- 881 71. Y. Jiang *et al.*, Oxidized low-density lipoprotein induces secretion of interleukin-  
882 1beta by macrophages via reactive oxygen species-dependent NLRP3  
883 inflammasome activation. *Biochem Biophys Res Commun* **425**, 121-126 (2012).
- 884 72. B. M. Alberts *et al.*, Secretion of IL-1beta From Monocytes in Gout Is Redox  
885 Independent. *Frontiers in immunology* **10**, 70 (2019).
- 886 73. F. Bauernfeind *et al.*, Cutting edge: reactive oxygen species inhibitors block  
887 priming, but not activation, of the NLRP3 inflammasome. *J Immunol* **187**, 613-  
888 617 (2011).
- 889 74. C. Marantos, V. Mukaro, J. Ferrante, C. Hii, A. Ferrante, Inhibition of the  
890 lipopolysaccharide-induced stimulation of the members of the MAPK family in  
891 human monocytes/macrophages by 4-hydroxynonenal, a product of oxidized  
892 omega-6 fatty acids. *Am J Pathol* **173**, 1057-1066 (2008).
- 893 75. J. S. Bezbradica, R. C. Coll, K. Schroder, Sterile signals generate weaker and  
894 delayed macrophage NLRP3 inflammasome responses relative to microbial  
895 signals. *Cellular & molecular immunology* **14**, 118-126 (2017).
- 896 76. K. Schroder *et al.*, Acute lipopolysaccharide priming boosts inflammasome  
897 activation independently of inflammasome sensor induction. *Immunobiology* **217**,  
898 1325-1329 (2012).
- 899 77. C. M. McKee, R. C. Coll, NLRP3 inflammasome priming: A riddle wrapped in a  
900 mystery inside an enigma. *J Leukoc Biol* **108**, 937-952 (2020).
- 901 78. Y. Yan *et al.*, Dopamine controls systemic inflammation through inhibition of  
902 NLRP3 inflammasome. *Cell* **160**, 62-73 (2015).
- 903 79. L. Mortimer, F. Moreau, J. A. MacDonald, K. Chadee, NLRP3 inflammasome  
904 inhibition is disrupted in a group of auto-inflammatory disease CAPS mutations.  
905 *Nat Immunol* **17**, 1176-1186 (2016).
- 906 80. R. C. Coll *et al.*, A small-molecule inhibitor of the NLRP3 inflammasome for the  
907 treatment of inflammatory diseases. *Nat Med* **21**, 248-255 (2015).
- 908 81. R. Kang *et al.*, Lipid Peroxidation Drives Gasdermin D-Mediated Pyroptosis in  
909 Lethal Polymicrobial Sepsis. *Cell Host Microbe* **24**, 97-108 e104 (2018).
- 910 82. S. Mukhopadhyay *et al.*, Immune inhibitory ligand CD200 induction by TLRs and  
911 NLRs limits macrophage activation to protect the host from meningococcal  
912 septicemia. *Cell Host Microbe* **8**, 236-247 (2010).
- 913 83. W. Ying, P. S. Cheruku, F. W. Bazer, S. H. Safe, B. Zhou, Investigation of  
914 macrophage polarization using bone marrow derived macrophages. *Journal of*  
915 *visualized experiments : JoVE* 10.3791/50323 (2013).
- 916 84. A. Boyum, Isolation of mononuclear cells and granulocytes from human blood.  
917 Isolation of mononuclear cells by one centrifugation, and of granulocytes by  
918 combining centrifugation and sedimentation at 1 g. *Scand J Clin Lab Invest Suppl*  
919 **97**, 77-89 (1968).
- 920 85. C. Zhang *et al.*, Vinpocetine protects against the development of experimental  
921 abdominal aortic aneurysms. *Clin Sci (Lond)* **134**, 2959-2976 (2020).

922

923

924 **Author Contribution Statement**

925 C.G.H., M.S., C.Y., B.C.B. designed research; C.G.H., C.L.C., C.Z., M.S. performed  
926 research; B.C.B. contributed new reagents/ analytic tools; C.G.H., C.Z. analyzed data;  
927 C.G.H., C.Y., B.C.B. wrote the paper.

928 **Acknowledgments**

929 None

930 **Funding Statement**

931 This work was financially supported by National Institute of Health HL134910 (to B.C.B.  
932 and C.Y.), HL140958 (to B.C.B.), Department of Defense DM190884 (to B.C.B.), New  
933 York State Department of Health C34726GG (to B.C.B. and C.G.H.).

934 **Ethics Statement**

935 All of the experiments were approved by the University Committee on Animal Use For  
936 Research (UCAR) at the University of Rochester and followed National Institutes of  
937 Health guidelines for experimental procedures on mice. Human blood samples from  
938 healthy donors were collected and processed at the University of Rochester Medical  
939 Center following Institutional Review Board approval.

940 **Conflict of Interest Statement**

941 The authors declare no conflict of interest.

942 **Data Availability Statement**

943 All data generated or analysed during this study are included in this published article and  
944 in its supplementary file.

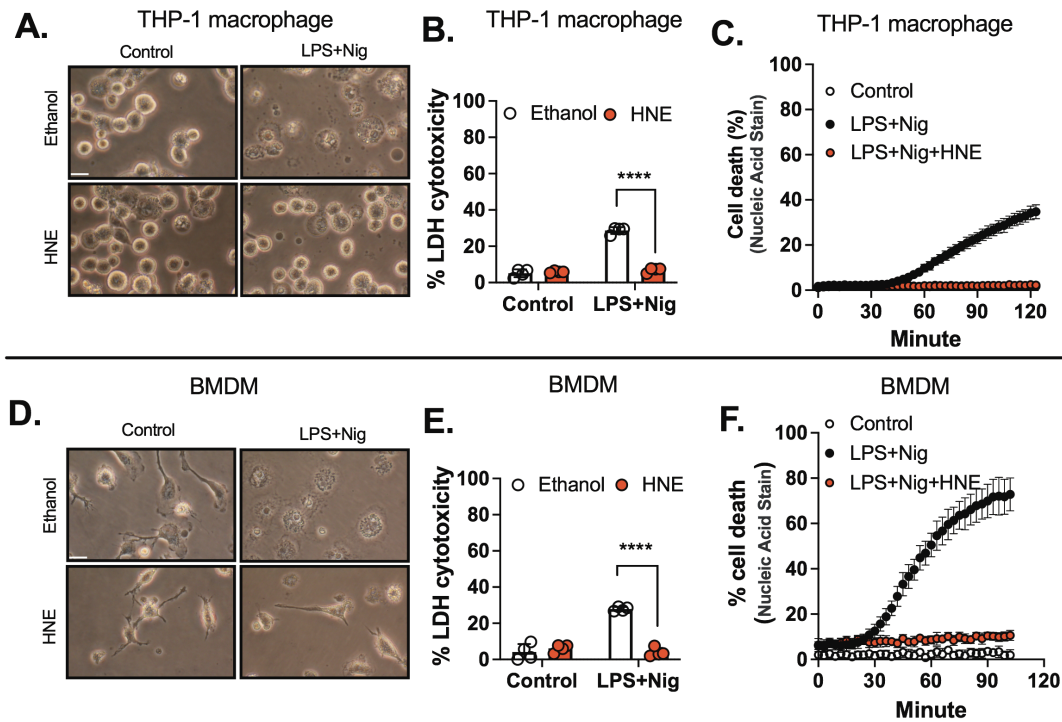

945

946 **Fig. 1. HNE inhibits pyroptotic cell death in human and mouse macrophages**

947 **A-C.** THP-1 differentiated macrophages were stimulated with LPS (100 ng/mL) and co-  
948 incubated with HNE (3  $\mu$ M) or vehicle (ethanol) for 3 hr followed by 2 hr of 6  $\mu$ M nigericin  
949 (Nig) treatment. (A) Cell morphology, scale bar = 10  $\mu$ m. (B) LDH cytotoxicity. (C) Cell  
950 death by SYTOX<sup>TM</sup> green.

951 **D-F.** Bone-marrow-derived macrophages (BMDMs) were stimulated with LPS (100  
952 ng/mL) and co-incubated with HNE (3  $\mu$ M) or vehicle (ethanol) for 3 hr followed by 1 hr  
953 of 2  $\mu$ M nigericin (Nig) treatment. (D) Cell morphology, scale bar = 10  $\mu$ m. (E) LDH  
954 cytotoxicity. (F) Cell death by SYTOX<sup>TM</sup> green.

955 Statistics in B and E were performed using a 2-way ANOVA and Bonferroni's post hoc  
956 test. \*\*\*\*P<0.001 between LPS+Nig+ethanol and LPS+Nig+HNE groups. (N=4  
957 experiments). Bars represent mean  $\pm$  SD.

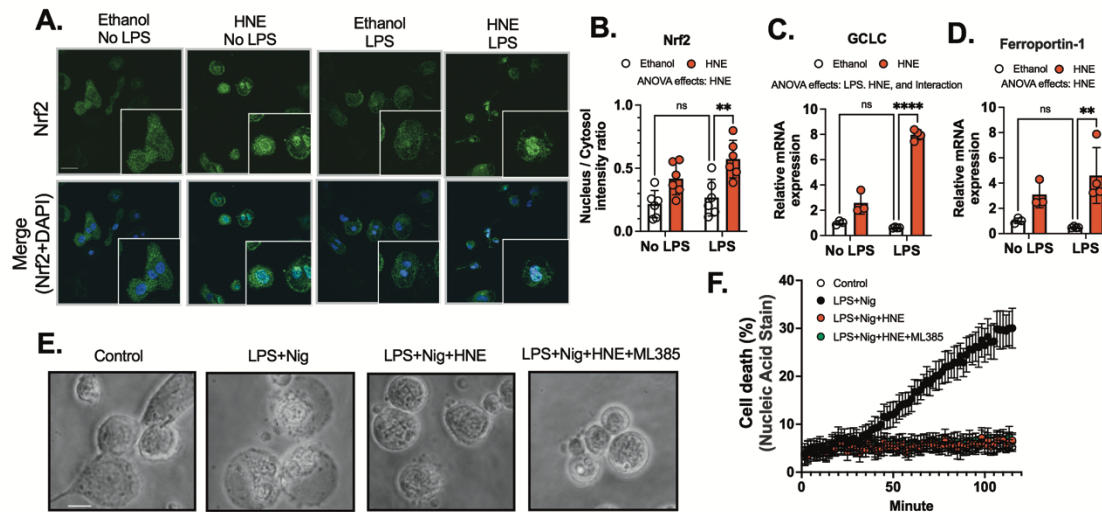

958

959 **Fig. 2. HNE inhibits pyroptosis independent of Nrf2 signaling.**

960 **A-B.** THP-1 macrophages were stimulated with or without LPS (100 ng/mL) and co-  
 961 incubated with ethanol or 3  $\mu$ M HNE for 3 hr. (A) Nrf2 translocation was determined by  
 962 immunofluorescence (scale bar: 10  $\mu$ m), DAPI (blue), and Nrf2 (Green). (B) Nuclear to  
 963 cytosolic Nrf2 intensity ratio was quantified by Image J.

964 **C-D.** Peritoneal macrophages were stimulated with or without LPS (100 ng/mL) and co-  
 965 incubated with ethanol or 3  $\mu$ M HNE for 3 hr. Gene expression was analyzed by real-  
 966 time PCR. (C) GCLC mRNA expression and (D) Ferroportin-1 mRNA expression were  
 967 measured after normalizing to  $\beta$ -actin expression.

968 **E-F.** THP-1 macrophages were treated with LPS with or without 3  $\mu$ M HNE or 2  $\mu$ M  
 969 ML385 for 3 hr followed by 6  $\mu$ M nigericin (Nig) to induce inflammasome activation. (E)  
 970 Cell morphology, scale bar=5  $\mu$ m. (F) Cell death by SYTOX<sup>TM</sup> green.

971 Statistics in B, C, and D were performed using a 2-way ANOVA and Bonferroni's post  
 972 hoc test. \*\*P<0.01 \*\*\*\*P<0.001 between HNE and ethanol groups after LPS treatment.

973 Bars represent mean  $\pm$  SD.

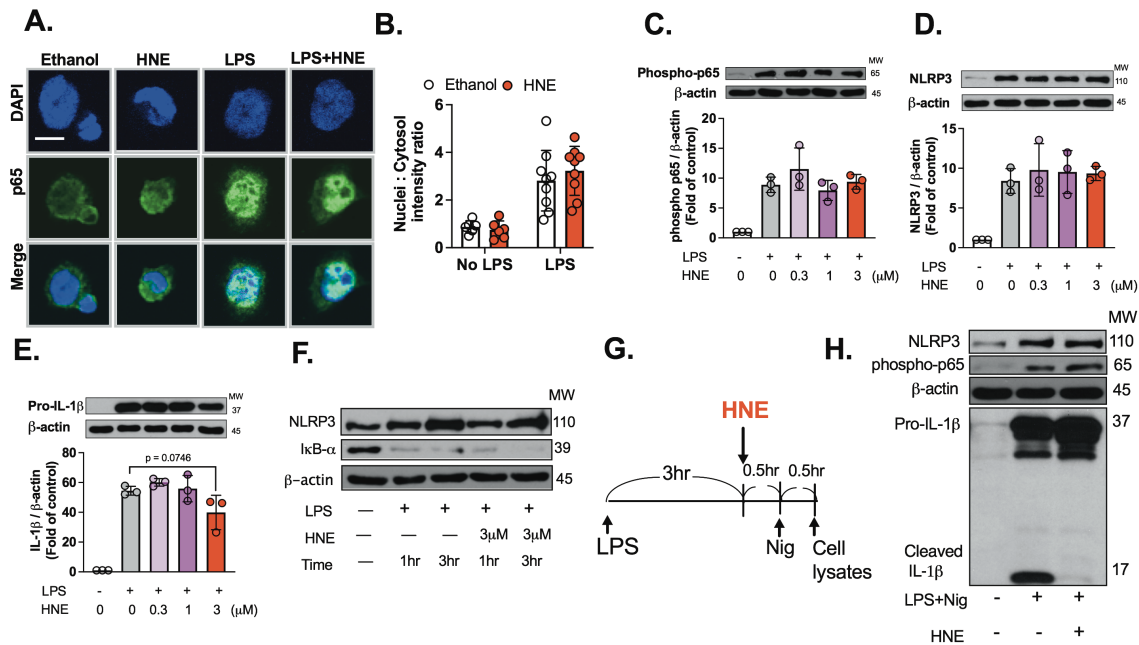

974

975 **Fig. 3. HNE inhibits IL-1 $\beta$  cleavage independently of NF- $\kappa$ B signaling in**  
 976 **macrophages.**

977 **A-B.** THP-1 macrophages were stimulated with or without LPS (100 ng/mL) and co-  
 978 incubated with ethanol or 3  $\mu$ M HNE for 1 hr. (A) NF- $\kappa$ B p65 translocation was measured  
 979 by immunofluorescence (scale bar: 5  $\mu$ m), DAPI (blue), and p65 (Green). (B)  
 980 Quantification using Image J. N=3 experiments

981 **C-E.** Peritoneal macrophages were stimulated with or without LPS (100 ng/mL) and co-  
 982 incubated with ethanol or HNE (0.3-3  $\mu$ M) for 3 hr. Protein expression was analyzed by  
 983 western blot. (C) phosphorylation of p65, (D) NLRP3, (E) Pro-IL-1 $\beta$ . Bars represent  
 984 mean $\pm$ SEM. N=3 experiments.

985 **F.** Peritoneal macrophages were stimulated with LPS (100 ng/mL) and co-incubated with  
 986 ethanol or HNE (3  $\mu$ M) for 1 or 3 hr. Cell lysates were analyzed by western blot. (F)

987 NLRP3, I $\kappa$ B- $\alpha$ , and  $\beta$ -actin western blots are representative of three independent  
988 experiments.

989 **G-H.** (G) Schematic of experimental design for data in Fig. 3H. (H) BMDMs were  
990 stimulated with LPS (100 ng/mL) for 3 hr followed by 6  $\mu$ M nigericin (Nig) for 30 min. 3  
991  $\mu$ M HNE or ethanol was added 30 min before nigericin. Western blots (NLRP3, p65  
992 phosphorylation,  $\beta$ -actin, pro-IL-1 $\beta$ , and cleaved IL-1 $\beta$ ) are representative of three  
993 independent experiments.

994 Statistics in B were performed using a 2-way ANOVA and Bonferroni's post hoc  
995 test. Statistics in C-E were performed using a one-way ANOVA and Bonferroni's post  
996 hoc test. N=3 experiments. A p-value less than 0.05 is statistically significant among  
997 treatment groups. Bars represent mean  $\pm$  SD.



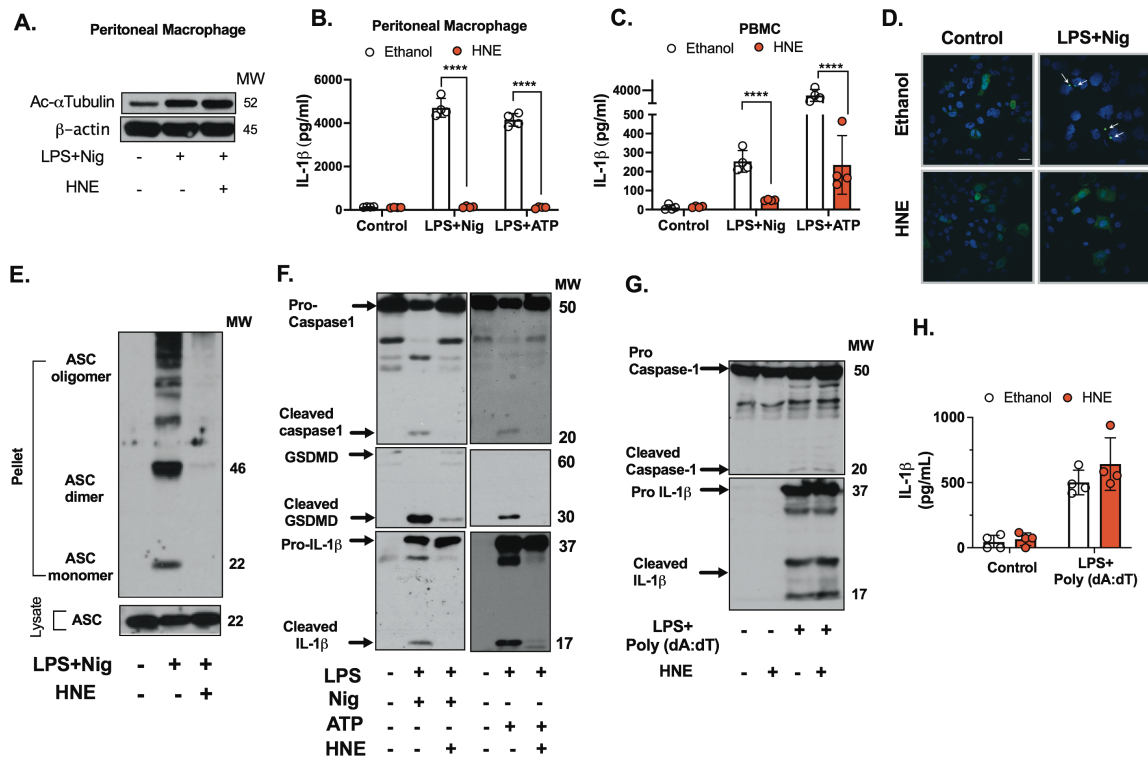

998

999 **Fig. 4. HNE inhibits NLRP3 inflammasome activation.**

1000 **A-F.** HNE (3  $\mu$ M) or ethanol was added 30 min before nigericin, ATP, or poly(dA:dT)  
 1001 treatment.

1002 **A.** Peritoneal macrophages were stimulated with LPS (100 ng/mL) for 3 hr followed by  
 1003 2  $\mu$ M nigericin (Nig). Acetyl- $\alpha$ -Tubulin (Lys40) western blots are representative of three  
 1004 independent experiments.

1005 **B-C.** (B) Peritoneal macrophages and (C) Human PBMC were stimulated with LPS (100  
 1006 ng/mL) for 3 hr followed by 2  $\mu$ M nigericin (Nig) or ATP (2 mM) stimulation for 1 hr. IL-1 $\beta$   
 1007 in the medium was measured by ELISA. Bars represent mean $\pm$ SD.

1008 **D.** THP-1 macrophages that overexpressed ASC-GFP were stimulated with LPS (100  
 1009 ng/mL) followed by 6  $\mu$ M nigericin (Nig) for 2 hr. ASC speck formation (arrows) was

1010 measured by confocal microscopy. (scale bar: 10  $\mu$ m ). Quantification results were  
1011 shown at lower magnification images in Fig. S6.

1012 **E.** THP-1 macrophages were stimulated with LPS (100 ng/mL) for 3 hr followed by 6  
1013  $\mu$ M nigericin (Nig) for 2 hr. ASC oligomerization western blots are representative of three  
1014 independent experiments.

1015 **F.** Peritoneal macrophages were stimulated with LPS (100 ng/mL) for 3 hr followed by  
1016 2  $\mu$ M nigericin (Nig) or ATP (2 mM) stimulation for 15 min. Western blots are  
1017 representative of three independent experiments.

1018 **G.** Peritoneal macrophages were stimulated with LPS (100 ng/mL) for 3 hr followed by  
1019 2 $\mu$ g/mL Poly(dA:dT) for 6 hr. Ethanol or 3  $\mu$ M HNE was co-incubated with cells 30 min  
1020 before Poly(dA:dT). Western blots are representative of three independent experiments.

1021 **H.** THP-1 macrophages were stimulated with LPS (100 ng/mL) for 3 hr followed by  
1022 2 $\mu$ g/mL Poly(dA:dT) for 6 hr. IL-1 $\beta$  in the medium was measured by ELISA.

1023

1024 Statistics in B, C, and H were performed using a 2-way ANOVA and Bonferroni's post  
1025 hoc test. \*\*\*\*P<0.001 between control and treatment groups. Bars represent mean  $\pm$  SD.

1026

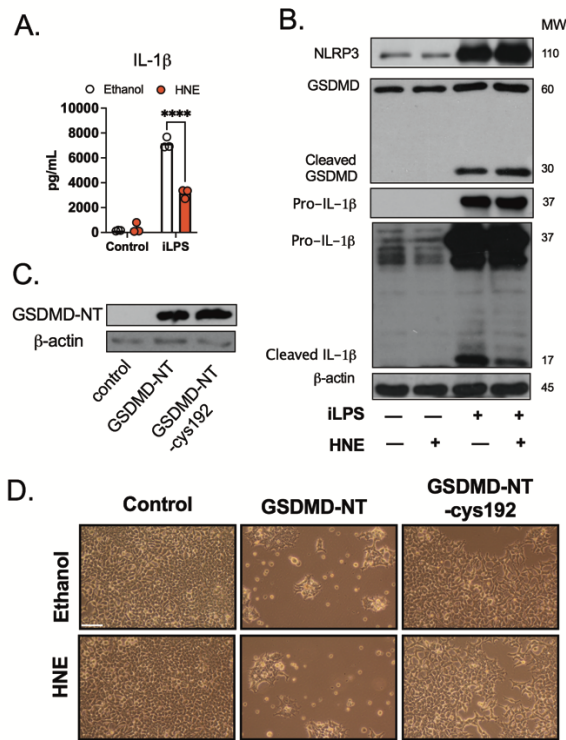

1027

1028 **Fig. 5. HNE inhibits non-canonical inflammasome-mediated IL-1 $\beta$  secretion, but**  
1029 **has no effect on GSDMD-mediated cell death.**

1030 **A-B.** Peritoneal macrophages were stimulated with LPS (100 ng/mL) for 3 hr followed by  
1031 intracellular LPS transfection (1  $\mu$ g/mL) for 16 hr. Ethanol or 3  $\mu$ M HNE was co-incubated  
1032 with cells 30 min before intracellular LPS transfection. (A) IL-1 $\beta$  in the medium (B)  
1033 Western blots are representative of three independent experiments.

1034 **C-D.** HEK293 cells were transfected with GSDMD-NT or GSDMD-NT-cys192 to Ala192.  
1035 Ethanol or 3  $\mu$ M HNE was co-incubated with cells. (C) Western blots are representative  
1036 of three independent experiments. (D) Micrographs of cultures were obtained 48 hr after  
1037 transfection under phase contrast illumination using 20X objective, scale bar=100  $\mu$ m.  
1038 Images are representative of three independent experiments.

1039 Statistics in A were performed using a 2-way ANOVA and Bonferroni's post hoc  
1040 test. \*\*\*\* $P < 0.001$  between control and treatment groups. Bars represent mean  $\pm$  SD.

1041

1042

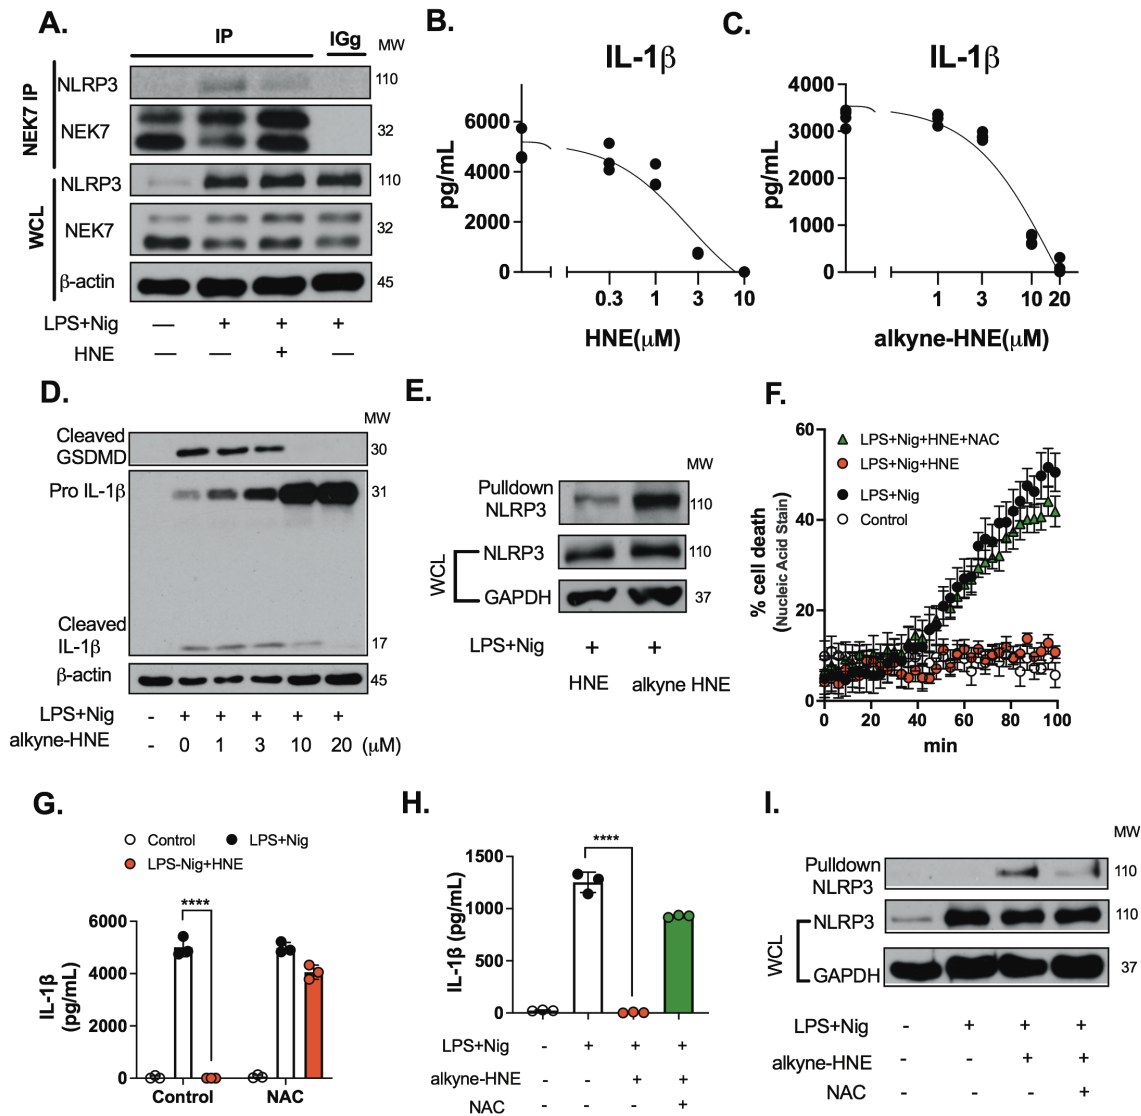

1043

1044 **Fig. 6. HNE inhibits inflammasome activation by blocking the NLRP3-NEK7**

1045 **interaction and a cysteine dependent mechanism**

1046 **A** BMDM were stimulated with LPS (100 ng/mL) for 3 hr followed by 2  $\mu$ M nigericin

1047 (Nig) for 60 min. Ethanol or 3  $\mu$ M HNE was added 30 min before nigericin. Immunoblots

1048 of NLRP3, NEK7, and  $\beta$ -actin from NEK7-immunoprecipitated and whole cell lysates

1049 (WCL) are representative of three independent experiments.

1050 **B-D.** Peritoneal macrophages were stimulated with LPS (100 ng/mL) for 3 hr followed by  
1051 2  $\mu$ M nigericin (Nig) for 1 hr. HNE (0-10  $\mu$ M) or alkyne-HNE (0-20  $\mu$ M) was added 30 min  
1052 before nigericin. (B and C) IL-1 $\beta$  in the medium. The dose-response curve was plotted  
1053 by using a logarithmic x-axis to cover a range of HNE or alkyne-HNE concentrations. (D)  
1054 Protein expression was measured by western blot. (N=3-4 independent experiments)

1055 **E.** THP-1 macrophages were stimulated with LPS (100 ng/mL) for 3 hr followed by 6  
1056  $\mu$ M nigericin (Nig) for 30 min. HNE (3  $\mu$ M) or alkyne-HNE (10  $\mu$ M) was added 30 min  
1057 before nigericin. Immunoblots of NLRP3 pulldown with streptavidin after performing a  
1058 click reaction on whole cell lysates (WCL). Data are representative of three independent  
1059 experiments.

1060 **F-G.** THP-1 macrophages were stimulated with LPS (100 ng/mL) for 3 hr followed by  
1061 nigericin (Nig, 6  $\mu$ M) for 2 hr. HNE (3  $\mu$ M), n-acetyl cysteine (NAC, 500  $\mu$ M), or both  
1062 were co-incubated with cells. (F) Cell death by SYTOX<sup>TM</sup> green. (G) IL-1 $\beta$  in the  
1063 medium.

1064 **H-I.** BMDM were stimulated with LPS (100 ng/mL) for 3 hr followed by nigericin (Nig, 2  
1065  $\mu$ M) for 30 min. Alkyne-HNE (10  $\mu$ M), N-acetyl cysteine (NAC, 500  $\mu$ M), or both were  
1066 added 30 min before nigericin. (H) IL-1 $\beta$  in the medium. (I) Immunoblots of NLRP3  
1067 pulldown with streptavidin after performing a click reaction on whole cell lysates (WCL)  
1068 are representative of three independent experiments.

1069 Statistics in G and H were performed using a 2-way ANOVA and Bonferroni's post hoc  
1070 test. \*\*\*\*P<0.001 between control and treatment groups. Bars represent mean  $\pm$  SD.

1071

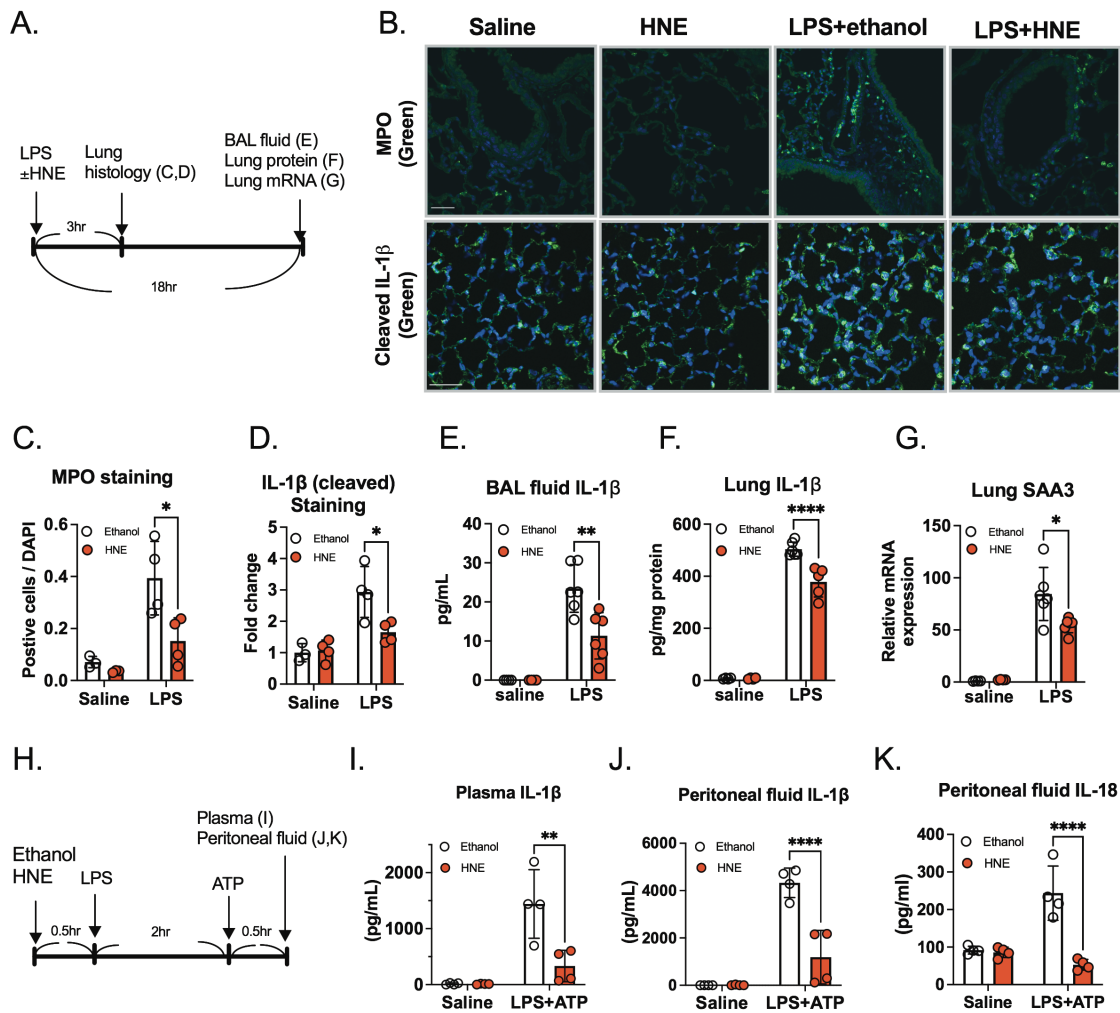

1072

1073 **Fig. 7. HNE inhibits IL-1β and IL-18 secretion in mouse acute lung injury model**  
 1074 **and sepsis model.**

1075 **A-G.** (A) Schematic of experimental design for LPS-induced acute lung injury in mice.  
 1076 Ethanol (0.01%) in saline (50 μl), HNE (6 μM) in saline (50 μl), LPS (2 mg/kg) + ethanol  
 1077 (0.01%) in saline, or LPS (2 mg/kg) + HNE (6 μM) in saline were delivered  
 1078 oropharyngeally to mice. Lung tissues were harvested at 3 hr post treatment for  
 1079 immunohistochemistry (N=4 mice from each group). BAL fluid, lung tissue protein and  
 1080 RNA were harvested at 18 hr (N=4 mice from each saline group, and N=6 from each

1081 LPS group). (B) Immunofluorescence of representative lung sections for  
1082 myeloperoxidase (MPO) (Green) or cleaved IL-1 $\beta$  (Green). DAPI (Blue), (scale bar=40  
1083  $\mu$ m). Quantification results of (C) MPO, and (D) cleaved IL-1 $\beta$ . (E) IL-1 $\beta$  protein in BAL  
1084 fluid and (F) IL-1 $\beta$  protein in lung tissue. (G) SAA3 mRNA expression in lung tissue was  
1085 measured by real-time PCR and normalized to  $\beta$ -actin.

1086 **H-K.** (H) Schematic of experimental design for LPS-ATP-induced inflammasome  
1087 activation in mice. Mice were pre-injected with ethanol, HNE (2 mg/kg) 0.5 hr before LPS  
1088 (10 mg/kg) i.p. for 2 hr followed by ATP (100 mM in 100  $\mu$ l, pH 7.4) i.p. Plasma and  
1089 peritoneal fluid were harvested 0.5 hr after ATP treatment for cytokine assay measured  
1090 by ELISA . (I) IL-1 $\beta$  in plasma, (J) IL-1 $\beta$  in peritoneal fluid. (K) IL-18 in peritoneal fluid.  
1091 (N=4 mice from each group).

1092 Statistics in C-G and I-K were performed using a 2-way ANOVA and Bonferroni's post  
1093 hoc test. \*P<0.05, \*\*P<0.01, \*\*\*\*P<0.001 between ethanol and HNE treatment groups  
1094 after injury. Bars represent mean  $\pm$  SD.



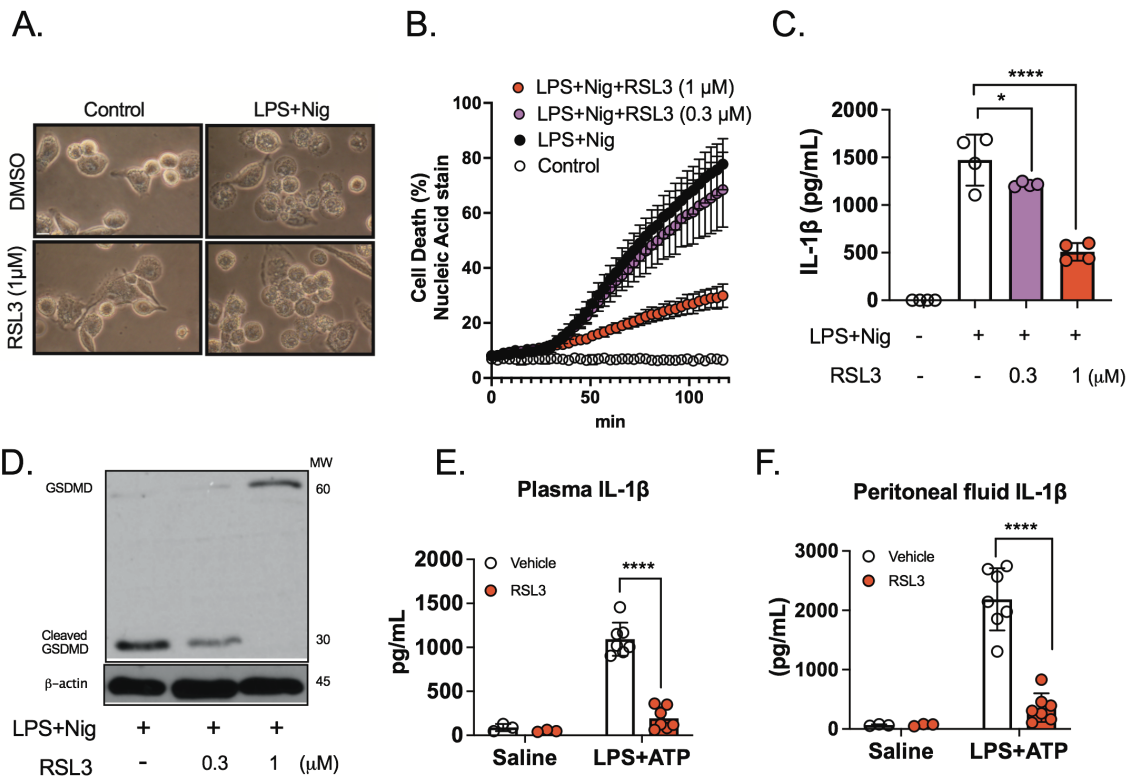

1095

1096 **Fig. 8. GPX4 inhibition by RSL3 reduces inflammasome activation in macrophages**  
 1097 **and in an in vivo sepsis model.**

1098 **A-B.** THP-1 macrophages were stimulated with LPS (100 ng/mL) for 3 hr followed by  
 1099 nigericin (Nig, 6 μM) for 2hr. DMSO, or RSL3 (0.3 or 1 μM) was co-incubated with cells.  
 1100 (A) Cell morphology, scale bar= 5 μm . (B) Cell death by SYTOX™ green.

1101 **C-D.** Peritoneal macrophages were stimulated with LPS (100 ng/mL) with or without  
 1102 RSL3 (0.3 or 1 μM) for 3 hr followed by nigericin (Nig, 2 μM) for 30 min. (C) IL-1β in the  
 1103 medium. (D) Western blots are representative of three independent experiments.

1104 **E-F.** Mice were injected i.p. with vehicle, or 2 mg/kg RSL3 30 min before LPS (10mg/kg).  
 1105 Two hr after LPS, mice were injected i.p. with ATP (1mg/kg). After 30 min, plasma and

1106 peritoneal fluid were harvested for ELISA. (E) plasma IL-1 $\beta$ , and in (F) peritoneal fluid IL-  
1107 1 $\beta$ . N=3 mice from each saline group, and N=7 from each LPS-ATP group

1108 Statistics in C, E, and F were performed using a 2-way ANOVA and Bonferroni's post  
1109 hoc test. \*P<0.05, \*\*\*\*P<0.001 among treatment groups. Bars represent mean  $\pm$  SD.

1110
